1 TITLE

2

3 Type two secretion systems secretins are necessary for exopolymeric slime secretion  
4 in cyanobacteria and myxobacteria

5

6

7

8 SHORT TITLE Secretin-facilitated EPS secretion

9 Major/Minor Classifications Biological Sciences/Microbiology

10

11 Author line **David M. Zuckerman<sup>a,1,\*</sup>, Jeffery Man To So<sup>a,\*</sup>, and Egbert Hoiczyk<sup>a,3</sup>**

12

13 Author Affiliations

14 School of Biosciences, Krebs Institute, University of Sheffield, Sheffield, S10 2TN

15 <sup>1</sup>Present address: Department of Biology, Iona College, New Rochelle, NY 10801

16

17 \*These two authors contributed equally

18

19

20 <sup>3</sup>Corresponding Author(s) contact information [E.Hoiczyk@Sheffield.ac.uk](mailto:E.Hoiczyk@Sheffield.ac.uk)

21

22

23

## 24 **Significance**

25 Many bacteria exhibit gliding motility, movement across surfaces. This motility has been  
26 correlated with the deposit of slime trails in their wake. To date, the mechanism of slime  
27 secretion has not been understood, and no cell envelope-structures have been identified that  
28 are involved in slime secretion during gliding motility. Here, we show that cyanobacteria  
29 and myxobacteria use the secretins PilQ/GspD, the outer membrane channels of the T2SS,  
30 for slime secretion, which demonstrates a novel cargo transport capacity of these  
31 multifunctional outer membrane gates.

32

33

## 34 **Abstract**

35 While protein translocation in Gram-negative bacteria is well understood, our knowledge  
36 about the translocation of other high-molecular-weight substances is limited. Nozzle-like  
37 structures that secrete exopolymeric substances during gliding motility have previously been  
38 observed in the outer membranes of cyanobacteria and myxobacteria. Here, we show that

1 these nozzles are composed of the secretins PilQ/GspD, the outer membrane component of  
2 the type II and III secretion systems, the type IV pilus apparatus, and filamentous phage  
3 extrusion machinery. Our results show for the first time that secretins may be used for  
4 secretion of non-proteinaceous polymers in some bacteria, considerably expanding the  
5 repertoire of substrates of these multifunctional outer membrane gates. Moreover, we show  
6 that *gspD* is an essential gene in *Myxococcus xanthus*, which, when depleted, renders this  
7 bacterium defective in slime secretion and gliding motility.

8  
9  
10 \body

## 11 12 **Introduction**

13 Secretion of macromolecules is an important component of environmental adaption, and a  
14 key property of any living cell. Like eukaryotic cells, bacteria contain dedicated  
15 macromolecular secretion systems in the cell envelope that are used to translocate proteins,  
16 nucleic acids, and carbohydrates (1). Despite an extraordinary diversity of both substrates  
17 and bacterial cell physiologies, there are only a limited number of secretion systems. In  
18 Gram-negative bacteria, twelve protein (type I-IX, the Bam and Lpt machineries, and the  
19 chaperone/usher pathway (1-5)), one nucleic acid (type IV; 6), and three carbohydrate  
20 (Wzx/Wzy, ABC transporter, and synthase-dependent (7)) secretion systems have been  
21 described. Moreover, a close inspection of these molecular machines reveals the utilization  
22 of multiple homologous proteins, suggesting divergence from common ancestry. Diversity  
23 between the systems appears to have evolved through use of novel proteins, and “mixing-  
24 and-matching” of protein components between translocation machineries (8).  
25 One well-studied component of secretory machinery shared between several systems is the  
26 secretin family of proteins (9-11). These multimeric proteins form the outer membrane (OM)  
27 gates of the type II and III secretion systems, the type IV pilus apparatus, and filamentous  
28 phage extrusion machinery (12-14). Secretins form a functional channel with an OM pore  
29 that is 5–8 nm wide, allowing the passage of large cargo molecules such as folded proteins  
30 and multimeric protein fibers. These channels are typically formed by the assembly of 15  
31 monomers of GspD (e.g. GspD<sub>Ecol</sub> 15mer PDB ID code 5WQ7), or 12 to 14 (in some cases  
32 up to 19; 15) monomers of PilQ (e.g. PilQ<sub>Mxan</sub> 12mer PDB ID code 3JC9; PilQ<sub>Pacr</sub> 14mer  
33 PDB ID code 6VE3; 10, 16-18). Nearly all secretins (with the known exception of HxcQ of  
34 *Pseudomonas aeruginosa*; 19) require additional proteins, called pilotins or accessory  
35 proteins, for their assembly. These proteins contribute to stability, OM targeting, and  
36 oligomerization of the secretins (20). Secretins can be identified by their highly-conserved  
37 secretin domains located at or near the C-terminus of the protein, which form the OM-  
38 embedded portion of the complex (21-22). The N-terminal domains have greater variability,  
39 and create multiple ring structures that form a large periplasmic vestibule (21, 23). These N-  
40 terminal domains also form a prominent constriction between the actual secretin gate and the  
41 vestibule, termed the periplasmic gate, whose functional significance is currently not  
42 completely understood (22, 23-25). The N-terminal periplasmic domains interact with  
43 additional proteins, including the cargo and the cytoplasmic membrane-embedded platform  
44 of the secretion machinery, to facilitate the opening of the channel and the docking and  
45 release of cargo. Importantly, this process must be highly controlled to prevent unintended  
46 breaches of the OM. Although the cargos of the best-understood systems are folded proteins

1 or protein fibers, the transient interactions with the channel should theoretically enable  
2 secretins to translocate highly diverse molecules, including non-proteinaceous ones.  
3 While protein secretion has long been studied in Gram-negative bacteria, our understanding  
4 of the secretion of additional extracellular materials is less complete (26-28). In part, this is  
5 because the complexity of extracellular polymeric substances (EPS) is confounding. For  
6 example, many EPS species are composed of polysaccharides (29), and bacteria utilize a  
7 greater diversity of monosaccharides than amino acids. These monosaccharides are  
8 connected by various chemical linkages, and are further diversified by chemical alterations  
9 introduced by enzymatic modification (for examples see 30-31). Despite these differences,  
10 secretion of both protein and EPS pose similar challenges to the cell, as bulky, hydrophilic,  
11 high-molecular-weight polymers are translocated across hydrophobic membranes. So far,  
12 three different mechanisms have been described for EPS secretion in Gram-negative bacteria  
13 (28, for a review in *Myxococcus xanthus* see 32): the Wzx/Wzy, the ABC transporter, and  
14 the synthase-dependent secretion pathways. The Wzx/Wzy pathway is used by bacteria for  
15 the synthesis of group I capsular exopolysaccharide, O-antigen lipopolysaccharide (LPS) and  
16 succinoglycan EPS, which are synthesized from sugar phosphates that bind to a carrier lipid  
17 in the cytoplasmic membrane (26-28). Upon binding, the monomers form short  
18 oligosaccharides that are flipped across the membrane, polymerized by a periplasmic  
19 enzyme (Wzy), and fed into the Wza channel (33). The ABC transporter pathway is used for  
20 group 2 capsular polysaccharides, the LPS common antigens and N-glycosylation of outer  
21 membrane and periplasmic proteins, in which the entire carbohydrate is synthesized on a  
22 carrier lipid before being transported across the cytoplasmic membrane *via* an ABC  
23 transporter (28, 34). Both the Wzx/Wzy and the ABC transporter pathways rely on proteins  
24 of the polysaccharide co-polymerase (PCP) and OM polysaccharide export (OPX) protein  
25 families for OM translocation (35-37). Although members of the OPX protein families can  
26 be easily identified using bioinformatics, structural data for is protein families are scarce.  
27 The only exception is the Wza channel (PDB ID code 2J58) of the Wzx/Wzy system from *E.*  
28 *coli* which has been resolved at atomic resolution (38). Of note, the tandem  $\beta$ -grasp fold that  
29 forms the periplasmic domain of Wza can also be found in the group 4 polysaccharide  
30 capsule protein GfcC (39). However, the exact role of GfcC in polymer secretion is yet to be  
31 determined (40). For the PCP protein family, full-length structures of Class 1 PCP Wzz  
32 (PDB ID code 6RBG) and Class 2 PCP Wzc (PDB ID code 7NHR) have recently been  
33 solved using cryo-electron microscopy (41, 42). The third EPS secretion mechanism, which  
34 appears to be used by bacteria for the secretion of many high-molecular-weight  
35 polysaccharide moieties, such as cellulose (43), alginate (44), and poly- $\beta$ -D-*N*-  
36 acetylglucosamine (PNAG; 45), is called the synthase-dependent pathway (7), referring to  
37 the fact that a cytoplasmic membrane-embedded glycosyl transferase simultaneously  
38 facilitates polymerization and trans-membrane translocation (46). Depending on the  
39 substrate in question, these steps can be performed with or without participation of a carrier  
40 lipid and, in some cases, are stimulated by the bacterial second messenger bis-(3'-5')-cyclic  
41 dimeric guanosine monophosphate (c-di-GMP; 47). Once in the periplasm, the newly formed  
42 polymer interacts with a tetratricopeptide repeat (TPR-) containing protein (48) and is  
43 released through an OM porin like AlgE (49, PDB ID code 3RBH).  
44 While some EPS polymers with relevance to medicine and industry have been widely  
45 studied (27), the majority of EPS molecules produced by environmental bacteria are poorly  
46 characterized. One such environmental EPS, often referred to as slime, is deposited as trails

1 behind certain gliding bacteria (50), including cyanobacteria (51) and myxobacteria (52).  
2 Although it is generally accepted that slime secretion in these organisms is important for  
3 motility (53), the precise contribution in some gliding microbes is less clear (54) due to the  
4 absence of information on the characteristics of slime. Namely, the composition of the slime,  
5 enzymes that synthesize the slime, and the slime secretion apparatus have yet to be  
6 determined.  
7 In this study, we use structural and biochemical assays to identify the OM secretion channel  
8 for slime. We found that the secretins PilQ and GspD constitute the slime-secretion nozzles  
9 in cyanobacteria and myxobacteria, respectively. Our results show for the first time that  
10 secretins can facilitate translocation of molecules other than proteins or protein fibers,  
11 considerably expanding the repertoire of substrates of these multifunctional OM gates.  
12 Moreover, our results show that *gspD* is an essential gene in *M. xanthus* that, when depleted,  
13 renders this bacterium defective in slime secretion and motility, confirming that GspD-  
14 facilitated secretion is essential for gliding in this bacterium. Our results add to our  
15 knowledge that secretins are involved in the secretion of toxins and pilus-mediated host  
16 attachment, finding that they also contribute to motility and potentially the formation of  
17 biofilms through exopolysaccharide secretion.  
18



1 **Results**

2 **PilQ forms the Slime Nozzle in Filamentous Cyanobacteria**

3 Previously, we demonstrated that cyanobacteria of the genera *Oscillatoria*, *Phormidium*,  
4 *Lyngbya*, and *Anabaena* used rows of tilted nozzles (“junctional pore complexes”) at the  
5 cross walls of their multicellular filaments to secrete bands of slime (51, 55). Since these  
6 bands elongated at the same rate with which the filaments were moving, it was proposed that  
7 slime secretion powers gliding motility (56). We wished to identify the slime secretion  
8 apparatus, however, the complex culture requirements of these species made isolating these  
9 nozzles impossible at the time (57). Therefore, we initially used the more easily cultivated  
10 species *Arthrospira (Spirulina) platensis* for the current study (58). As this free-floating  
11 species is usually cultivated in aerated reactor vessels, most available clones are non- or  
12 temporarily non-motile. For that reason, we initially confirmed that our clone secreted slime  
13 using direct observations (51) and was able to glide in an established clumping assay (59-60;  
14 *SI Appendix, Fig. S1*). Next, thin sections of cryo-substituted cells were analyzed by electron  
15 microscopy to confirm the presence of the tilted trans-peptidoglycan channels harboring the  
16 nozzle apparatus (Fig. 1 A-C). Rotary shadowing and negative staining of preparations of  
17 isolated OMs were used to directly visualize rows of nozzles (Fig. 1D). Together, these  
18 results documented that the cell envelope architecture and arrangement of nozzles in *A.*  
19 *platensis* is identical to all of our previously studied filamentous cyanobacteria (55). To  
20 identify the major component(s) of the nozzles, we next purified cell envelopes, fractionated,  
21 and screened for the presence of nozzle-like complexes using electron microscopy. This  
22 strategy yielded nozzle-enriched fractions, devoid of any other large-scale complexes (Fig.  
23 1E). Ring-shaped top views of the complexes were also observed upon adsorption to grids  
24 without glow discharge, likely due to a preferential adsorption of the complex on these grids  
25 (Fig. 1F), as previously reported (51). These nozzle-enriched fractions were separated by  
26 SDS-PAGE, and revealed two prominent protein bands at >250 and 30 kDa (Fig. 1G). Mass  
27 spectrometry and Edman degradation identified these proteins as the secretin PilQ (*SI*  
28 *Appendix, Table S1*) and the pentapeptide repeat protein NIES39\_A07680 (61). To further  
29 verify that PilQ forms the nozzles complexes, isolated nozzles were labeled using antisera  
30 raised against GspD from *M. xanthus* (see below) that cross-reacts with PilQ from *A.*  
31 *platensis* (*SI Appendix, Fig. S2A*), and visualized by immunogold labeling and electron  
32 microscopy. Anti-GspD antisera labeled about 50% of nozzles (Fig. 1H), while control  
33 antisera labeled only 15% of the complexes. Finally, we averaged negatively stained *A.*  
34 *platensis* nozzle complexes and compared them with published averages of other secretin  
35 complexes revealing strong structural similarities even with distantly related complexes  
36 furthermore supporting our interpretation that PilQ forms the nozzles of filamentous  
37 cyanobacteria (*SI Appendix, Fig. S3*).

38 With a candidate nozzle protein identified, we next attempted to visualize PilQ at the sites of  
39 slime secretion *in situ*. Although the ease of cultivation of *A. platensis* initially offered  
40 advantages, with continuous culture a substantial portion of the filaments lost their PilQ  
41 nozzles, ceased secreting slime, and became non-motile, a phenomenon that we had  
42 previously observed in permanently agitated cultures of benthic gliding cyanobacteria (62).  
43 As this mixed population of nozzle-containing and nozzle-free filaments yielded inconsistent  
44 results, we decided to use two highly motile benthic species, *Oscillatoria lutea* (SAG 1459-  
45 3) and *Phormidium autumnale* (strain Chesterfield) for further experiments. Genome  
46 sequence was obtained from both strains, and the gene for *pilQ* from *O. lutea* was expressed

1 in *E. coli*. Protein was purified and used to inoculate rabbits to raise antisera. Although this  
2 antibody specifically cross-reacted with the PilQ band of both species in immunoblots (*SI*  
3 *Appendix, Fig. S2B*), initial attempts at fluorescent labeling of the nozzles in live filaments  
4 were unsuccessful. We attributed these difficulties to the inaccessibility of epitopes on PilQ  
5 due to the complex multilayered architecture of cyanobacterial cell envelopes. Here, the  
6 PilQ-containing outer membrane is sandwiched between a many nanometer-thick and  
7 heavily cross-linked peptidoglycan layer and an extracellular barrier comprised of an S-layer  
8 topped by the helically arranged glycoprotein oscillin (*55, 62-63*). To potentially increase  
9 access for the antibodies, we used isolated cell envelopes for our labeling experiments, but  
10 again failed to observe labeling of the PilQ nozzles at cell-cell junctions. However, within  
11 these preparations we consistently observed isolated disc-shaped cross walls that still had the  
12 nozzle-containing portion of the longitudinal wall attached (observed by the pores in the cell  
13 wall), and we saw clear peripheral immunolabeling of these cross walls with the anti-PilQ  
14 antisera (*Fig. 2A; SI Appendix, Fig. S4*). These results supported our initial interpretation  
15 that PilQ epitopes were masked in our earlier attempts to immunolabel intact cells. Since a  
16 number of conventional permeabilization methods such as lysozyme or organic solvent  
17 treatment failed to allow labeling or resulted in the disintegration of the filaments, we  
18 attempted to perform limited cell lysis to remove some of the cell wall material. Exposure of  
19 live filaments to increased temperature or incubation with 200 mM DTT (*64*) were among  
20 the most reproducible treatments to induce limited cell lysis. Upon treatment of the  
21 filaments, the rows of nozzles were clearly labeled with the anti-PilQ antibody confirming  
22 that the nozzles at the cross walls were indeed composed of PilQ (*Fig. 2B*). Unfortunately,  
23 the extensive multi-step treatment required for immunofluorescence imaging of the nozzles  
24 precluded the possibility to simultaneously retain and visualize slime secretion.  
25 Consequently, we used fluorescently-labelled concanavalin A to visualize slime secretion in  
26 living cells to determine whether slime trails emerged from the cross walls, where nozzles  
27 are located. As the fluorescently labeled slime bands usually translocate along the filaments'  
28 surfaces (*Fig. 2C*), we had to apply a continuous flow to shear them from the surface. Under  
29 these conditions, the slime dislodged from the filament surface (*51*), revealing individual  
30 strands. However, the high gliding speed of these cells and the copious amount of slime  
31 secreted posed additional challenges in locating the precise origin of secretion (*Fig 2D*).  
32 Subjecting the cell filaments to a gentle burst of sonication and cooling before imaging  
33 appeared to encourage slime dislodgement and decrease gliding speed, respectively. With  
34 these treatments, we observed individual strands of slime emanating in close proximity to  
35 mature and nascent cross walls (*Fig, 2E*), where PilQ nozzles are located (*Fig. 2 A and B*).  
36 This is consistent with a previous report of the localization of slime secretion when slime  
37 was stained using India Ink (*51*). Taken together, this evidence supports the interpretation  
38 that the secretin PilQ is used for slime secretion in filamentous cyanobacteria.

#### 40 **GspD is a Candidate for Slime Nozzles in *M. xanthus***

41 Because multicellular filamentous cyanobacteria are difficult to genetically manipulate, and  
42 to test if other slime-secreting bacteria also use secretin nozzles, we next studied the soil  
43 bacterium *M. xanthus*. This strategy was based on earlier observations of virtually identical  
44 nozzle-like structures in the outer membrane of this bacterium that were in close proximity  
45 to the emergence of slime bands on the surface of the cells (*52*). To identify the nozzles from  
46 *M. xanthus*, we used a similar approach as for the cyanobacteria. Isolated cell envelopes

1 were purified and solubilized. We examined fractions by electron microscopy to screen for  
2 the presence of structures of similar shape and size as the OM-embedded nozzles previously  
3 observed (**Fig. 3A**). In contrast to the nozzles from *A. platensis*, we only observed ring-  
4 shaped top views of the complex, but not side-views (compare **Fig. 1F** and **3C**). Using our  
5 fractionation protocol, we isolated fractions highly enriched in nozzle-like structures, and  
6 correlated the presence of these nozzles to a ~270 kDa band on SDS-PAGE gels (**Fig. 3B**  
7 **and C**). Using mass spectrometry, the band was identified as GspD (*SI Appendix, Table S1*),  
8 suggesting that secretins are also used by myxobacteria in slime secretion. Since the secretin  
9 PilQ in *M. xanthus* is known to contribute to social (S-) motility as the outer membrane  
10 channel of the type IV pilus (**65-67**), but not gliding motility, we tested whether PilQ was  
11 also used for slime secretion in this species. Using mutants that lack PilQ, we successfully  
12 isolated nozzles and observed slime trails that were indistinguishable from the wildtype,  
13 demonstrating that PilQ is not involved in slime secretion (*SI Appendix, Fig. S5*). Of note,  
14 like in the investigated cyanobacteria (**Fig. 1G** and *SI Appendix, Fig. S2*), the molecular  
15 weight of the PilQ/GspD band was substantially larger than the predicted molecular weight  
16 of the mature outer membrane-associated protein (i.e. *A. platensis*: 756 aa, 81 kDa; *M.*  
17 *xanthus*: 840 aa, 90 kDa). Moreover, the high-molecular-weight bands from both species  
18 displayed a pronounced temperature-dependency; while the intensity of the *A. platensis* PilQ  
19 band decreased somewhat upon boiling, the *M. xanthus* GspD band completely disappeared  
20 after heating above 70 °C. We interpret these observations to indicate that at high  
21 concentrations and high temperatures, the protein irreversibly aggregated and failed to enter  
22 the gel (**68**). By contrast when using smaller amounts of GspD that are present in whole cell  
23 lysates and visualized by immunoblot, neither the high-molecular-weight proteins nor the  
24 temperature-dependence were observed (compare **Fig. 3B** and **4A**). Under these  
25 circumstances, we observed a protein band at the expected molecular weight of ~100 kDa.

### 26 ***gspD* is an Essential Gene in *M. xanthus***

27 To study a possible contribution of GspD to *M. xanthus* slime secretion, we attempted to  
28 generate a markerless deletion mutant of *gspD*. However, while we were able to recover  
29 multiple clones with an integrated deletion plasmid, we consistently failed to recover a  
30 deletion mutant following a second recombination event to remove the plasmid. Instead, all  
31 attempts yielded clones that had reverted to the parental wildtype strain, a result we obtained  
32 across multiple attempts in different genetic backgrounds. We next pursued a strategy of  
33 generating a conditional knockdown mutant. For this, we introduced a second copy of *gspD*  
34 under the control of the copper-inducible promoter,  $P_{cuoA}$  at the *attB* site (**69**) into our clones  
35 that had successfully integrated the deletion plasmid. When selecting for removal of the  
36 plasmid in the presence of copper, we were able to recover multiple clones with *gspD*  
37 deleted from the chromosomal locus. These observations support the interpretation that *gspD*  
38 is an essential gene.

39 To test the depletion of GspD, we grew cultures in media with copper, then washed and re-  
40 suspended the cells in media lacking copper, but containing the copper chelator  
41 bathocuproinedisulfonic acid (BCS). Equal cell numbers were collected at various time  
42 points, lysed with sample buffer, and examined by immunoblot using an affinity purified  
43 antibody against the C-terminus of GspD (see materials and methods for details). GspD  
44 levels declined for more than 24 h following removal of copper before leveling off at a low,  
45 but consistently detectable, amount (**Fig. 4A**). This low level was not due to a small number  
46

1 of escape mutants, but was visualized by immunofluorescence as a weak signal in all cells  
2 present in the culture (**Fig. 4B**). Cells grown in the presence of high concentrations of copper  
3 displayed enhanced fluorescence at the periphery of the cell, in a pattern consistent with  
4 signal from endogenous GspD in wildtype cells but at levels higher than for endogenous  
5 protein (**Fig. 4B**). Overexpression of GspD under these conditions was similarly confirmed  
6 by immunoblot (*SI Appendix, Fig. S6*).

7 Consistent with the expression patterns of GspD in copper-depleted cells, we found that our  
8 *gspD* cells would grow for several generations in liquid culture in the absence of copper, but  
9 at longer times (>24 h) the growth rates of the cultures would dramatically decline. To test  
10 the requirement for copper in the media, cells were grown in the absence of copper for 48 h  
11 (the earliest observed time of maximum GspD depletion (**Fig. 4A**)), and serial dilutions were  
12 spotted on agar plates lacking or containing copper. We observed no effect of this handling  
13 on the survival or growth of wildtype cells, but *gspD* mutants were highly dependent on  
14 copper in the media, confirming that the cells need to express GspD in order to survive and  
15 grow (**Fig. 4C**).

### 17 **GspD Depletion Yields Fewer Nozzles and Reduced Slime Secretion in *M. xanthus***

18 To test the hypothesis that GspD is the major component of the slime nozzle, we grew *gspD*  
19 mutant cells in the absence or presence of copper. Cells were collected, and OMs were  
20 disrupted with glass beads and examined by TEM for the presence of nozzles (**52**). While we  
21 found few of the complexes in the OM from cells depleted for GspD, we observed large  
22 numbers of such structures in the OM fragments from cells grown in the presence of copper  
23 (**Fig. 5A**).

24 We next wished to assay for production of slime. Multiple methods have been reported for  
25 the detection of slime in *M. xanthus*, including phase contrast microscopy (**70**), India ink  
26 (**71**), acridine orange (**52**), atomic force microscopy (**72**), wet-SEEC or fluorescently labeled  
27 ConA (**54**). However, material other than slime is produced by cells during locomotion and  
28 biofilm formation (**73-75**), which may confound results. Thus, to visualize slime directly, we  
29 performed negative staining and examination by electron microscopy, as described (**52**). To  
30 observe slime trails, we grew cells in liquid culture with or without copper for 40 h, spotted  
31 them on EM grids coated with hydrolyzed chitosan, and allowed them to glide. Grids were  
32 then stained and examined by TEM for the presence of slime trails. We identified slime trails  
33 as having distinct morphology (distinguishable from membrane vesicles and tubule-like  
34 outer membrane protrusions, as well as the S-motility-related fibrils) in the TEM, and by  
35 their pH sensitivity, as treatment with acidic stains (un-buffered uranyl acetate (UA), pH 4.5  
36 or SiPTA at pH 4.0) removed slime trails (but not other membrane components, i.e. vesicles)  
37 from grids, while neutral stains (SiPTA at pH 7.0) did not (*SI Appendix, Fig. S7*). We  
38 consistently found that cells expressing *gspD* regularly secreted slime, visualized as  
39 persistent and thick trails emerging from the cell body, whereas cells depleted for GspD  
40 produced very low levels of slime, or none at all (**Fig. 5B**). In these depleted cells, the only  
41 extracellular material that resembled slime was often fragmented bands of material, thinner  
42 and shorter than slime trails observed in wildtype or *gspD*-overexpressing cells (**Fig. 5B**).  
43 We considered that the loss of the essential functions of GspD may lead to cell death, and  
44 the lack of slime secretion we observed was simply due to observations of dead or dying  
45 cells. To address this concern, we grew cells in the presence of low, moderate, or high  
46 concentrations of copper for 24 h. We selected 24 h as the time for pre-culture, since at this

1 time point, there is depletion of GspD from the cells, but not maximal depletion (**Fig. 4A**),  
2 and cells in liquid cultures did not yet show a growth defect. We selected copper  
3 concentrations that had previously demonstrated minimal toxicity to *M. xanthus* cells (**69**).  
4 Cells grown under these conditions were spotted on EM grids, and the numbers of slime  
5 trails emerging from individual cells with intact membranes (to avoid sick or dead cells)  
6 were counted. Compared to the cells grown with moderate copper levels, cells grown with  
7 low levels of copper produced nearly half as many slime trails ( $15.6 \pm 7.2$  vs.  $8.8 \pm 8.0$   
8 trails/cell). Moreover, overexpression of GspD resulted in a doubling of the slime trails for  
9 cells grown in high levels of copper ( $32.2 \pm 17.6$  trails/cell; **Fig. 5C**). This observed GspD-  
10 dependent increase is a strong indication of the direct contribution of GspD to slime  
11 secretion.

12  
13 Taken together, these data demonstrate that under conditions where GspD was partially  
14 depleted from the cells, that cell survival was unaffected, whereas slime secretion was  
15 dramatically reduced. These data support the conclusion that slime secretion is specifically  
16 associated with the reduction of GspD.

### 17 18 **GspD is Necessary for Gliding Motility in *M. xanthus***

19 As all models for gliding motility in *M. xanthus* suggest an important role for slime (**53, 76**),  
20 we predicted that slime-deficient mutants should be defective in gliding. To test this, we  
21 grew cells for 24 h in media lacking copper, spotted these cells onto agar plates containing,  
22 or lacking copper, and allowed cells to swarm for 48 h. When these cells were plated onto  
23 media lacking copper, we observed cell growth from the initial, dilute spot. However, while  
24 the absence or presence of copper had no effect on the ability of wildtype cells to expand,  
25 the *gspD* mutant completely depended on copper for individual-cell motility (**Fig. 6**). To  
26 ensure that *gspD* expression was stimulating gliding (adventurous, or A-motility in *M.*  
27 *xanthus*), and not the type-4 pilus-dependent S-motility, we generated *gspD* mutants in the  
28 S-motility deficient  $\Delta pilA$  background. Whereas the parent strain was able to expand in the  
29 absence or presence of copper, the *gspD* mutant required copper for motility (**Fig. 6**).  
30 Since we had concluded that *gspD* is an essential gene, we tested that in this assay the cells  
31 were living, but simply unable to glide. All of the swarm colonies became denser over the  
32 48 h of the assay, including those that did not demonstrate motility, indicating growth of the  
33 colonies. Moreover, *gspD* cells grown under conditions similar to the gliding motility assay,  
34 but plated on soft agar to promote S-motility, demonstrated swarm expansion typical of S-  
35 motility in both the absence and presence of copper (*SI Appendix, Figure S8A*),  
36 demonstrating both that GspD was not necessary for S-motility and that even under  
37 conditions of GspD depletion, cells were still actively motile. The swarm colony was smaller  
38 for cells grown in the absence of copper, likely due to a slower growth rate of the cells from  
39 depleted levels of GspD; however, motility was clearly observed. We also collected cells  
40 from  $\Delta pilA$  *gspD* swarm colonies plated in the absence or presence of copper, and  
41 determined cell viability. We observed no differences in the ratio of living to dead cells (*SI*  
42 *Appendix, Fig. S8B*), suggesting that the cells that survived the copper depletion expressed  
43 enough GspD to survive, but not to swarm (**Fig. 4A**). Taken together, these results  
44 demonstrate that cells sufficiently survived the depletion of GspD in these experiments, and  
45 that swarm expansion could have been detected had it occurred. Thus, we conclude that



1 *gspD* is an A-motility gene, which may have not been identified in previous genome-wide  
2 genetic screens (reviewed in (77)) because it is an essential gene.

### 4 **Discussion**

5 EPS secretion is an important strategy for environmental adaption of bacteria (78). With  
6 enormous varieties of chemical compositions, molecular weight, and adherence to bacterial  
7 surfaces, these molecules serve a wide variety of purposes, including as important  
8 components of the bacterial cell envelope (4, 26, 32), providing protection against  
9 desiccation and toxic substances (78-80), mediating attachment to surfaces (78, 81), biofilm  
10 formation (82-83), host interaction (84-85), and bacterial motility (53, 56). Although there  
11 are many methods for detection of bacterial EPS, relatively little is known about the  
12 chemical composition, synthesis, and secretion of these molecules.

13 Here we show that the secretins PilQ and GspD form the previously observed EPS-secreting  
14 nozzles in cyanobacteria (51) and myxobacteria (52). As Gram-negative bacteria can possess  
15 multiple envelope-associated macromolecular secretory complexes, it was essential to ensure  
16 that the ring-shaped molecules we isolated were indeed the slime nozzles. For this reason,  
17 we initially used the cyanobacterium *A. platensis*, which, as a photosynthetic autotroph, is  
18 capable of EPS production while having fewer secretory systems that may have been  
19 mistaken for nozzles. In fact, BLAST searches reveal that none of the three cyanobacteria  
20 species used contain transport systems with large outer membrane gate structures such as  
21 T3SS, T4SS, and T6SS. Only Wza homologs are found that are substantially smaller than  
22 the nozzles, based on the dimensions of the *E. coli* protein (outer diameter 4.6 nm). In line  
23 with these observations, isolations from *A. platensis*, *O. lutea*, and *Ph. autumnale* invariably  
24 yielded a single type of ring-shaped complex formed by PilQ, allowing identification of  
25 secretins as the principle structural component of the slime nozzles of filamentous  
26 cyanobacteria (51). This interpretation is supported by immunoblot analyses (SI Appendix,  
27 Fig S2), mass spectrometry (SI Appendix, Table S1), structural comparisons with known  
28 secretin complexes (SI Appendix, Fig S3; 10), direct immunogold labeling of the isolated  
29 complexes (Fig. 1H), immunofluorescence microscopy of *O. lutea* and *Ph. autumnale*  
30 filaments (Fig. 2 A and B), and the correlation of the localization of PilQ (by  
31 immunolabelling) with the pores (by electron microscopy) to isolated cross walls (compare  
32 Fig. 2A and SI Appendix, Fig S4).

33 The identification of the secretins PilQ and GspD as the OM channels for EPS secretion in  
34 cyanobacteria and *M. xanthus*, respectively, was consistent with the electron microscopic  
35 appearance of the isolated nozzles (10). In contrast, the presence of the second protein in  
36 cyanobacteria, the pentapeptide repeat protein NIES39\_A07680 was surprising.  
37 Pentapeptide repeat proteins form a family (Pfam 00805) whose members are not widely  
38 distributed beyond cyanobacteria and have been implied in unknown targeting or structural  
39 functions (86). Although NIES39\_A07680 appeared to co-purify with PilQ, its structural or  
40 functional relation to the secretin is currently unknown. Its small size and the presence of  
41 multiple repetitive putative protein-protein interaction motifs (pentapeptide repeats (86)  
42 rather than TPR (87)) reveal that NIES39\_A07680 shares no similarity with known pilotins  
43 or secretin accessory proteins (20). Another unexpected finding was that the nozzles we  
44 recovered from cyanobacteria were almost entirely dimers of PilQ rings (615 out of 618  
45 structures were dimers), similar to earlier observations (333 out of 334 structures; 51), while  
46 the *M. xanthus* nozzles were isolated as single ring complexes. Although initially quite

1 different in appearance (compare **Fig. 1E** and **3C**), adsorption of *A. platensis* nozzles to grids  
2 without glow discharge resulted in top views that clearly revealed the common ring-shaped  
3 architecture of the nozzles (compare **Fig. 1F** and **3C**). We considered two scenarios that  
4 could account for the different appearance of the cyanobacterial nozzles: the cell envelope-  
5 embedded structures may in fact be monomeric rings as in all other studied secretins and the  
6 observed dimers had formed during their isolation, or the nozzles are dimers, revealing  
7 plasticity in certain secretins to form novel structural arrangements. The isolation of nozzles  
8 from *M. xanthus* may have been confounded by the presence of additional OM translocation  
9 machineries. However, our isolations fortuitously contained only one type of ring-shaped  
10 complex, namely the secretin GspD. In contrast to the nozzles from cyanobacteria, nozzles  
11 from myxobacteria were exclusively recovered as single ring structures, and no proteins  
12 were co-purified. These observations support the interpretation that the nozzles in both  
13 cyanobacteria and *M. xanthus* are monomeric rings that lack associated proteins or pilotins  
14 when fully assembled, and the visualization of PilQ dimers and recovery of  
15 NIES39\_A07680 were likely artifacts of the sample preparation.

16  
17 As PilQ is a component of the type II secretion system of the type IV pilus apparatus, our  
18 findings were consistent with the discovery that type IV pili-related proteins localize to the  
19 cross wall of the *Nostoc punctiforme* hormogonia and contribute to their transient motility  
20 (**88**). From our own and published genomic analyses, cyanobacteria belonging to the order  
21 Oscillatoriales, like the three species in this study, contain all components of the type IV  
22 pilus motility machinery required for function, and only one copy of *pilQ* is found. However,  
23 we have not observed pilus or pilus-like surface appendages in Oscillatoriales in this or  
24 previous studies (**51, 55, 62**). Although our findings appear to contradict earlier descriptions  
25 of putative pili (“fimbriae”) in *Arthrospira* and *Oscillatoria* (**89**), the pili described in this  
26 earlier study fundamentally differed from all other known unicellular cyanobacterial and  
27 prokaryotic pili: they were described as a helically arranged, tightly attached array consisting  
28 of parallel filament-like elements covering the entire surface of these filamentous species  
29 (**89**). While some investigators interpreted the parallel running elements of the array as pili  
30 (**89**), others thought of them as contractile actin-like filaments involved in the gliding  
31 motility of *Oscillatoria* species (**90**). Of note, the characteristics of these surface arrays, their  
32 tight attachment to the surface, the parallel arrangement of their substructures, the 60° angle  
33 with which the individual elements run helically along the long axis and the diameter of the  
34 individual substructures (6-9 nm) (**89, 90**) are identical to the features of the extracellular  
35 surface layer formed by the glycoprotein oscillin in *Oscillatoria*, *Lyngbya*, and *Phormidium*  
36 species (**62**). Importantly, oscillin is a large (> 66 kDa in *Ph. uncinatum*), heavily  
37 glycosylated, Ca<sup>2+</sup>-binding protein mostly composed of β-sheets that does not share any  
38 similarity with the small (< 25 kDa) α-helix-containing pilins. Taken together, we conclude  
39 that the structures described in this study are most likely the oscillin array, and more  
40 evidence would be needed to establish the presence of pili in members of the Oscillatoriales.  
41 Nonetheless it may be possible that, like *M. xanthus*, some filamentous cyanobacteria like  
42 *Nostoc* can switch between pilus-dependent and -independent modes of motility, but under  
43 yet unknown circumstances, which intriguingly suggests that secretins represent a conserved  
44 core component that is important to both gliding and pilus-dependent motility.

45



1 Unlike the three studied cyanobacteria, the predatory myxobacteria (91-92) possess copies of  
2 virtually all known Gram-negative protein secretion machineries (93). In fact, the genome of  
3 *M. xanthus* contains 3 paralogs of *gspD*, namely *gspD*, *pilQ*, and *mxan\_RS15055* (previously  
4 *mxan\_3106*) (93), with the greatest sequence similarity within the secretin domain (SI  
5 Appendix, Fig. S9). All three paralogs have been identified in proteomics studies as  
6 expressed and localized to the OM or OM vesicles of *M. xanthus* cells under various  
7 environmental conditions (94). PilQ is the outer membrane secretin of the type IV pilus (66),  
8 while Mxan\_RS15055 (Om031 in *M. fulvus*) has been reported to be involved in  
9 osmoregulation allowing cells to better survive under increasing salinity (95). Together,  
10 these data show that the three paralog secretins, PilQ, Mxan\_RS15055, and GspD have  
11 distinct non-interchangeable functions and that the role of GspD in slime secretion and A-  
12 motility is unique.

13 To explain the dependence of slime secretion on the presence of secretins, we consider two  
14 plausible mechanisms: secretins could either be directly involved in slime secretion as the  
15 OM gates through which the synthesized polymer is secreted, or indirectly by secreting  
16 enzymes that then polymerize slime on the cell surface, similar to synthesis of bacterial  
17 dextrans (28). In dextran production, secreted surface-associated transglycosylases  
18 enzymatically cleave extracellular sugar polymers such as sucrose, starch, or fructans to  
19 convert the resulting monosaccharides into dextran polymers. To consider whether such a  
20 process could account for slime polymerization in our organisms, it is important to study the  
21 repertoire of secreted proteins. In *M. xanthus*, GspD has recently been shown to translocate  
22 MYXO-CTERM domain-containing proteins (96), of which 34 have been bioinformatically  
23 identified using the TIGR03901 consensus motif (97). Only one of those 34 proteins, MtsC  
24 (Mxan\_RS06455, MXAN\_1334; 98) is involved in motility, but not A-motility. None of the  
25 five MYXO-CTERM domain-containing proteins, (Mxan\_RS04600, MXAN\_6274, PQQ-  
26 dependent sugar dehydrogenase; Mxan\_RS30220, MXAN\_6236, putative polysaccharide-  
27 degrading enzyme; Mxan\_RS30405, MXAN\_6274, polysaccharide deacetylase family  
28 protein; Mxan\_RS34095, MXAN\_7044, exo-alpha-sialidase; Mxan\_RS34570,  
29 MXAN\_7140, glycosyl hydrolase) that are involved in carbohydrate metabolism show  
30 similarity to transglycosylases. Moreover, CTT does not contain cleavable sugar polymers,  
31 and physiological experiments have shown that *M. xanthus* is unable to utilize glucose,  
32 starch, or glycogen from the medium (99). Together, these observations indicate that it is  
33 highly unlikely that the slime in *M. xanthus* could be synthesized using an extracellular  
34 transglycosylase reaction (28). Likewise, in filamentous cyanobacteria, no transglycosylases  
35 (or indeed, any proteins) have been identified as PilQ substrates that could polymerize slime  
36 outside of the cell. BG11 medium, like CTT, does not contain any carbohydrates that could  
37 act as substrates for transglycosylase-like enzymes. To allow extracellular polymerization in  
38 the absence of cleavable carbohydrate precursors would necessitate the secretion of large  
39 quantities of activated UDP-sugars by the bacteria. However, no such polymerization  
40 process has been reported in any bacterium, and the unavoidable loss of UDP would make  
41 such a process metabolically extremely costly. Therefore, we consider the most plausible  
42 interpretation of our findings to be that the role of the secretins is to secrete polymeric slime.  
43 The discovery that bacteria use secretins as the OM gate for EPS secretion prompts the  
44 question whether this mechanism represents a completely novel type of EPS secretory  
45 pathway, or whether the secretin is used as the OM component of other, already known, EPS  
46 secretions systems (7, 28). Our attempts to test if additional components of the Gsp

1 machinery contributed to slime secretion in *M. xanthus* (GspE, GspG, and GspK) failed, as  
2 we were unable to obtain markerless deletions in the corresponding genes, suggesting that  
3 these are all essential genes, similar to *gspD* (own, unpublished observations). We also do  
4 not yet know all proteins involved in the synthesis, polymerization, and trans-periplasmic  
5 transport of slime. Nonetheless, evidence from cyanobacteria indicates that slime secretion  
6 may involve a synthesis-dependent mechanism. The secreted slime in *Phormidium*  
7 *uncinatum* is a complex heteropolysaccharide (100), and recent genetic work has identified a  
8 highly conserved, 13 gene-long locus that is important for EPS secretion and motility in all  
9 sequenced filamentous cyanobacteria (101). This *hps* locus encodes for five glycosyl-  
10 transferases (*hpsEFG, I, and K*) and four pseudopilins (*hpsBCD* and *H*), among others. The  
11 involvement of these genes suggests a potential link to secretins, as pseudopili have been  
12 proposed to act as pistons to push protein cargos through the OM secretin gate (22).  
13 Therefore, it is tempting to speculate that the *hps* locus encodes parts of a novel synthase-  
14 dependent system that secretes EPS slime using PilQ/GspD as the OM gates. Of note, the  
15 pore size of the secretin gates is substantially larger (6-8 nm) than the opening of other  
16 carbohydrate secretion gates, such as the Wza channel (1.7 nm (38)) or the alginate secretion  
17 porin AlgE (0.8 nm (102)). As alginate, for example, is a high-molecular-weight  
18 carbohydrate, the pore diameter does not appear to correlate with the molecular weight of the  
19 secreted EPS, suggesting that other factors dictate the size of the OM gate for a given  
20 secretory system. One such factor may be the number of polymer strands that are  
21 simultaneously secreted through the channel, suggesting that secretins may be high-  
22 throughput gates allowing the rapid secretion of multiple strands of EPS that could form the  
23 electron microscopically observed ribbons (this work and 52).  
24 The fact that GspD in *M. xanthus* is involved in two very different secretory processes,  
25 namely slime and protein secretion, may explain why genome-wide genetic screens have not  
26 identified mutant strains that were completely deficient in slime secretion, indicating that  
27 one or both of these processes are essential (70, 77). If slime secretion is necessary to the cell  
28 (for example, in formation of a capsule) or secretion of the MYXO-CTERM domain-  
29 containing proteins is essential (as they are essential surface-associated proteins (96)), this  
30 would explain our observation that *gspD* is an essential gene.  
31 Intriguingly, this raises the possibility that the same OM channel might engage multiple  
32 “accessory” protein complexes in the periplasm and cytoplasmic membrane. This potential  
33 versatility may explain why there appears to be a mismatch between the number of GspD  
34 nozzles and their distribution across the cell body with the observed slime bands emerging  
35 from the cell surface (an average cell possesses about 250 nozzles per pole (52) and a  
36 somewhat lower number spread over the length of the cell, while we observed many fewer  
37 slime bands; see i.e. Fig. 4B and SI Appendix, Fig. S5). A substantial number of GspD  
38 secretins may therefore participate in protein secretion alone, or multiple nozzles may  
39 contribute to each slime band. While plausible, this scenario is not the only possible  
40 explanation. It may be that slime secretion itself is essential in order to balance metabolic  
41 fluxes, or that GspD is involved in so far unknown transport process such as the release or  
42 uptake of low-molecular-weight substances, a possibility that is supported by observations of  
43 the diffusion of small molecular weight substrates through “closed” secretins (25, 103).  
44 An important aspect of EPS secretion in cyano- and myxobacteria is its putative role in  
45 gliding motility in these organisms (52, 56). Although an important role for slime secretion  
46 for motility is generally accepted (53), its exact contribution is a matter of debate ranging

1 from a passive adhesion factor (54), to a viscoelastic substrate (76), to a propulsive force  
2 generator (51, 101). What complicates resolving these issues is the possibility that the  
3 contribution of slime secretion to motility may be different in different bacteria. For the  
4 normally non-motile cyanobacterium *N. punctiforme*, hormogonia (short, transiently motile  
5 filaments) were recently reported to use slime secretion and type IV pilus-related proteins in  
6 gliding motility (88). Based on the finding that mutant strains lacking multiple  
7 glycosyltransferases (HpsE-G) were deficient in motility, and the observation that media  
8 conditioned by wild-type hormogonia could restore motility in these mutants, it was  
9 suggested that slime secretion facilitates motility but does not generate the motive force for  
10 gliding in *N. punctiforme* hormogonia (88). Importantly, permanently motile filamentous  
11 species like *O. lutea* and *Ph. autumnale*, or the previously studied cyanobacteria of the  
12 genera *Oscillatoria*, *Phormidium*, *Lyngbya*, and *Anabaena*, lack type IV pili (51, 55, 89) but  
13 still possess the conserved *hps* locus (101). We suggest that these species may synthesize  
14 slime similar to *N. punctiforme*, but may use their secretin PilQ directly for its secretion.  
15 Moreover, the absence of pili precludes that either retraction (like in *Synechocystis* or  
16 *Myxococcus*) or extension (as suggested for *N. punctiforme*) of these structures could power  
17 movement in the vast majority of filamentous cyanobacteria that, like the aforementioned  
18 cyanobacteria, are permanently motile but without pili. An important unresolved question in  
19 this context is whether parts of the type IV pilus machinery such as the minor pilins and the  
20 pilin PilA act as piston to push the slime out of the PilQ gate as has been suggested (88). The  
21 identification of PilQ/GspD as slime nozzle is therefore a necessary first step to allow testing  
22 these various hypotheses on the contributions of slime secretion to motility in these various  
23 bacteria. In this context, our observations of GspD-depleted cells clearly demonstrate that  
24 slime secretion contributes to gliding motility in *M. xanthus*. Thus, we provide direct  
25 molecular evidence that slime contributes to motility, and identify *gspD* as a *bona fide* A-  
26 motility gene. Moreover, that *gspD* is essential also explains why the nozzle has so far never  
27 been identified in genome-wide genetic screens (77), and suggests the possibility that  
28 additional key components of A-motility remain to be found.  
29 Alone, our results do not address the debate about the role of slime secretion in A-motility,  
30 since all current models propose a requirement for slime secretion. If slime secretion  
31 provides the propulsive force for motility, cells lacking slime secretion should lack A-  
32 motility, but the same would be true if slime is an important adhesion that provides surface  
33 contacts necessary for other molecular motors to act on (76). Therefore, additional  
34 experiments are required to address the precise role of slime secretion in A-motility; for  
35 example, the analysis of the chemical composition of the slime and its physicochemical  
36 properties, the identification and deletion of genes involved in its synthesis, and the  
37 determination of whether cells must themselves secrete slime to be motile, or simply require  
38 slime in their environment. Equally important will be to answer how widespread is the use of  
39 secretins as high-through-put nozzles for EPS secretion in Gram-negative bacteria.  
40

1

## 2 **Materials and methods**

3

### 4 **Bacterial Strains and Growth Conditions.**

5 *M. xanthus* cells were grown in CTT (1% casitone, 10 mM Tris pH 8.0, 8 mM MgSO<sub>4</sub>,  
6 1 mM KH<sub>2</sub>PO<sub>4</sub>) or ½ × CTT (0.5% casitone, 10 mM Tris pH 8.0, 8 mM MgSO<sub>4</sub>, 1 mM  
7 KH<sub>2</sub>PO<sub>4</sub>) and maintained on CTT plates with 1.5% agar (65). When appropriate, 100 µg/ml  
8 kanamycin or 15 µg/ml oxytetracycline was used for selection. *A. platensis* strain LB 2340  
9 from the Texas Algal Culture collection UTEX was grown under constant white light using  
10 an alkaline *Spirulina* medium: solution I (162 mM NaHCO<sub>3</sub>, 38 mM Na<sub>2</sub>CO<sub>3</sub>, and 2.9 mM  
11 K<sub>2</sub>HPO<sub>4</sub> in 500 ml dH<sub>2</sub>O) and II (29.4 mM NaNO<sub>3</sub>, 5.74 mM K<sub>2</sub>SO<sub>4</sub>, 17.1 mM NaCl,  
12 0.81 mM MgSO<sub>4</sub>, 0.27 mM CaCl<sub>2</sub> in 500 ml dH<sub>2</sub>O) were autoclaved separately, combined  
13 after cooling, and 2 ml of a sterile-filtered 0.1 mM vitamin B<sub>12</sub> solution was added. The  
14 freshwater cyanobacteria *O. lutea* (SAG 1459-3) and *Ph. autumnale* (strain Chesterfield;  
15 isolated by Dr Aya Farag from the University of Sheffield from a drainage site in  
16 Chesterfield and identified by 16S rRNA sequencing) were grown in BG11 medium  
17 (17.6 mM NaNO<sub>3</sub>, 0.23 mM K<sub>2</sub>HPO<sub>4</sub>, 0.3 mM MgSO<sub>4</sub>, 0.24 mM CaCl<sub>2</sub>, 0.031 mM citric  
18 acid, 0.021 mM ferric ammonium citrate, 0.0027 mM Na<sub>2</sub>EDTA, 0.19 mM Na<sub>2</sub>CO<sub>3</sub>, 1 ml  
19 trace metal mix in 1000 ml dH<sub>2</sub>O). Both strains, *O. lutea* and *Ph. autumnale* were sequenced  
20 by MicrobesNG (Birmingham). Strains used are listed in [Table 1](#).

21

### 22 **Construction of Copper-inducible Mutants.**

23 To generate a markerless deletion of the *gspD* gene, we transformed the parent cell line with  
24 pDMZ96 ([Table 2](#)) and selected for plasmid integration with 100 µg/ml of kanamycin.  
25 Clones were selected and grown in media lacking kanamycin, plated in media containing  
26 2.5% galactose to select for loss of the plasmid, and screened by PCR for gene deletion.  
27 Multiple attempts to delete *gspD* in several genetic backgrounds failed; consistent with the  
28 conclusion that *gspD* is an essential gene. As a secondary strategy, clones that had integrated  
29 the deletion plasmid were transformed with plasmid pDMZ94, which expresses the *gspD*  
30 gene regulated by the copper inducible promoter *P<sub>cuoA</sub>* from the Mx8 phage attachment site  
31 (69). Clones were collected and grown in media containing 300 µM CuSO<sub>4</sub> and subject to  
32 galactose selection. Multiple clones containing the *gspD* deletion at the native chromosomal  
33 locus were recovered, and maintained in CTT media supplemented with 300 µM CuSO<sub>4</sub>.

34

### 35 **Isolation and Purification of PilQ/GspD Nozzles.**

36 To isolate nozzles from the three cyanobacteria species, ca. 100 g wet weight of cells were  
37 harvested by centrifugation (10 min at 1,000 × g), washed twice in Tris-HCl buffer (10 mM  
38 Tris-HCl, pH 7.5), and chilled on ice. Cells were disrupted by glass beads using a  
39 Desintegrator S cell mill (Bernd Euler Prozesstechnik, Frankfurt) at 0 °C and unbroken cells  
40 were removed by low speed centrifugation (10 min at 1,000 × g). Crude cell envelopes were  
41 collected on ice and further purified using a Percoll density gradient (15% vol/vol) for 1 h at  
42 10,000 × g. The pale orange-colored pellet at the bottom of the gradient contained highly  
43 enriched cell envelopes. After several washes with Tris buffer, the purified envelopes were  
44 re-suspended in the buffer containing 2% Triton X-100 and 0.02% sodium azide. The  
45 suspension was shaken overnight at 37 °C and the autolytic digestion of the peptidoglycan  
46 monitored by light microscopy. Undigested cross walls and debris were removed by

1 centrifugation (10 min at  $50,000 \times g$ ) and crude nozzle preparations were collected in the  
2 ultracentrifuge (1 h at  $366,000 \times g$ ) before being further purified using a CsCl density  
3 gradient (0.3 g/ml). After overnight centrifugation, the band containing the nozzles was  
4 collected using a gradient fractionator (Labconco Auto Densi-Flow), dialyzed against Tris  
5 buffer, and the nozzles were either collected by centrifugation (1 h at  $366,000 \times g$ ) or further  
6 purified using 30 ml gradients of 10-40% sucrose (wt/wt). One milliliter of the nozzle-  
7 containing suspension was dialyzed against Tris buffer and then layered on top of the  
8 gradient and centrifuged at  $100,000 \times g$  for 17 h using a Beckman SW41 rotor. The twelve  
9 collected fractions were dialyzed against Tris buffer, examined in the electron microscope  
10 for the presence of nozzles using carbon-coated copper grids that were either glow  
11 discharged or not, and analyzed using SDS-PAGE. Proteins were identified using Edman  
12 degradation and mass spectrometry.

13 To isolate GspD nozzles from *M. xanthus*, ca. 80 g wt or  $\Delta pilQ$  cells were collected by  
14 centrifugation and re-suspended in 1 M sucrose by vigorous shaking. Cells and cell debris  
15 were removed by differential centrifugation ( $17,000 \times g$  for 10 min followed by  $32,000 \times g$   
16 for 10 min), and five volumes of chilled Tris buffer were added to dilute the sucrose.  
17 Enriched OMs were pelleted by centrifugation (10 min  $50,000 \times g$ ) and re-suspended in Tris  
18 buffer at a concentration of 0.1 g/ml. An equal volume of 1% solution of dodecyl-maltoside  
19 was added to solubilize the OMs and un-solubilized material removed by centrifugation  
20 (10 min  $50,000 \times g$ ). After addition of 0.3 mg/ml CsCl, the solution was centrifuged  
21 overnight at  $366,000 \times g$  using a Beckman SW 55 Ti rotor. A turbid yellowish band was  
22 visible about 2/3 of the way in the gradient and was identified as enriched in nozzle-like  
23 structures by TEM. These nozzle-containing bands were harvested, dialyzed against Tris  
24 buffer, and either directly analyzed or further purified as described above for the  
25 cyanobacteria.

### 26 27 **Antibody Production.**

28 His-GspD and His-PilQ<sub>Out</sub> were expressed in *Escherichia coli* BL21 cells and purified  
29 according to the manufacturer's instructions (Invitrogen, Carlsbad, CA). The proteins were  
30 injected into rabbits to generate polyclonal antibodies according to standard protocols (His-  
31 GspD, Cocalico, Reamstown, PA; His-PilQ<sub>Out</sub>, Eurogentec, Seraing, BE). Sera were tested  
32 for cross-reactivity by immunoblotting lysates from wildtype *M. xanthus* or cyanobacterial  
33 cells. To increase the specificity of the reactivity, we affinity purified the His-GspD  
34 antibodies. Amino acids 710-863 of GspD were expressed as a C-terminal fusion to the  
35 glutathione S-transferase protein (GST-GspD C-term) in *E. coli* BL21 strain, and captured  
36 with glutathione sepharose beads (GE Healthcare, Laurel, MD). Protein was eluted with  
37 10 mM glutathione in 50 mM Tris, pH 8.0, 5% glycerol, and examined for purity by SDS-  
38 PAGE and Coomassie staining. Five hundred micrograms of protein were dialyzed against  
39 binding buffer (PBS with 10 mM EDTA) and re-bound to glutathione sepharose beads.  
40 Protein was then crosslinked to beads with 5 mg/ml DTSSP (Thermo Fisher Scientific,  
41 Rockville, MD) in binding buffer for 45 min at RT. Buffer was drained and the reaction  
42 quenched by washing beads twice for 5 min with 100 mM Tris, pH 8.0. The beads were then  
43 washed extensively with binding buffer, and elution buffer (4 M MgCl<sub>2</sub>) to remove any un-  
44 crosslinked protein. Beads were normalized with binding buffer, and incubated with the  
45 antisera overnight at 4 °C. Sera were drained, and beads washed twice with wash buffer  
46 (10 mM Tris, pH 7.5, 0.2% deoxycholic acid) and twice with wash buffer plus 0.5 M NaCl.



1 Bound antibody was eluted with elution buffer, and collected in 1 ml fractions in tubes  
2 containing 50  $\mu$ l of 10 mg/ml bovine serum albumin, and transferred immediately to dialysis  
3 bags and dialyzed against 1 L of PBS plus 0.02% sodium azide. Antibodies were tested for  
4 activity by immunoblot against lysates from *M. xanthus* or nozzle-enriched fractions from  
5 the cyanobacterial cell envelope preparations and recognized a single band. Affinity  
6 purification was not necessary for the cyanobacterial antibody as it recognized only a single  
7 band in our species.

#### 9 **SDS-PAGE and Immunoblotting.**

10 Equal cell numbers from liquid grown cultures or equal amounts of CsCl fractions were  
11 solubilized in 2 $\times$  Tris-Glycine SDS buffer (Life Technologies) by boiling for 15 min.  
12 Samples were separated by SDS-PAGE and transferred to a PDF membrane (Millipore,  
13 Billerica, MA). The membrane was blocked with PBS containing 0.5% tween (PBST) and  
14 5% milk, and probed overnight with affinity purified anti-GspD or anti-PilQ in PBST plus  
15 3% BSA. The membrane was washed with PBST, and probed with HRP-conjugated anti-  
16 rabbit antibody (Jackson ImmunoResearch, West Grove, PA) in PBST containing 5% milk.  
17 HRP was activated using SuperSignal West Pico Chemiluminescent Substrate (Thermo  
18 Scientific, Rockford, IL) and imaged with a FluorChem Q system (Protein Simple,  
19 Wallingford, CT).

#### 21 **Electron Microscopy.**

22 To visualize slime secretion, carbon-coated gold grids (EMS) were glow discharged, coated  
23 with acid-hydrolyzed chitosan (54), and dried. Grids were held face-up by forceps, and 2  $\mu$ l  
24 of a suspension of cells grown in the absence or presence of copper were spotted onto the  
25 grid. Cells were incubated at room temperature (RT) in a humidity chamber for 20 min.  
26 Grids were rinsed with H<sub>2</sub>O and routinely stained with 1.5% silico phosphotungstate  
27 (SiPTA), pH 7.4 or, to identify non-slime material, with un-buffered UA (pH 4.5) or SiPTA,  
28 pH 4.0 citric acid. Grids were examined with a Hitachi 7600 or a Philips CM120  
29 transmission electron microscope at 80 kV, and micrographs collected using AMT Image  
30 Capture Engine software controlling an AMT ER50 5 megapixel CCD camera (Advanced  
31 Microscopy Techniques Corp., Danvers, MA).

32 To quantify the number of slime trails per cell, EM grids were prepared as above using cells  
33 grown for 24 h in liquid media containing 0.01, 0.2, or 0.5 mM CuSO<sub>4</sub>. Prepared grids were  
34 examined by EM, and isolated cells (>1 full cell-length from nearest neighboring cell) were  
35 selected at low magnification, so that slime trails could not be observed prior to imaging (to  
36 reduce experimenter bias). High magnification images were collected, and the numbers of  
37 slime trails emanating from at least 12 cells/condition were counted. Cells with disrupted  
38 OM were excluded. The average length of cells did not significantly vary between the  
39 populations (determined by one-way ANOVA (mean  $\pm$  S.D.: 0.01 mM CuSO<sub>4</sub> = 9.4  $\pm$  2.4  
40  $\mu$ m; 0.2 mM CuSO<sub>4</sub> = 11.5  $\pm$  4.2  $\mu$ m; 0.5 mM CuSO<sub>4</sub> = 9.2  $\pm$  2.4  $\mu$ m)). Data are presented as  
41 the mean number of slime trails per cell, with the standard deviation.

42 To disrupt OM for visualization of nozzles, cells swarming on hard agar with or without  
43 copper were scraped into CTT media in a 1.5 ml centrifuge tube. An equal volume of 710-  
44 1180  $\mu$ m glass beads was added (Sigma-Aldrich, St. Louis, MO), and samples were  
45 subjected to vortexing at maximum power for 2 min. Cells were applied to a glow  
46 discharged EM copper grids, stained with 2.5% UA and imaged as above.

1 Cryosubstitution of cyanobacterial cells was performed as described (55). Briefly, *A.*  
2 *platensis* cells were high-pressure frozen using a Leica EM PACT2 instrument (Leica  
3 Microsystems, Buffalo Grove, IL), cryo-substituted for 80 h at  $-87^{\circ}\text{C}$  in acetone containing  
4 2% osmium tetroxide, and, after slowly warming to RT, embedded in Spurr's resin. Thin  
5 sections were stained with UA and lead nitrate (104), and examined in a Philips CM12  
6 electron microscope. To visualize nozzles in membranes, isolated outer membranes were  
7 picked up on 200 mesh carbon-coated copper grids and unilaterally shadowed with Pt/C at  
8 an angle of  $45^{\circ}$ . Images at various magnifications were recorded as described above.

#### 9 10 **Immunoelectron Microscopy of Isolated GspD Nozzles.**

11 CsCl gradient fractions containing cell envelope proteins of *A. platensis* were adsorbed for  
12 15 sec to 200 mesh carbon-coated gold grids, washed with water and PBS and then  
13 incubated for 40 min with a 1:500 dilution of a serum from a rabbit inoculated with GspD  
14 from *M. xanthus*. The grids were washed on three drops of PBS before being incubated for  
15 12 min with a 5 nm gold-labelled anti-rabbit secondary antibody (Jackson ImmunoResearch  
16 West Grove, PA) at dilutions of 1:10. After repeated washes with PBS and water, the grids  
17 were stained with 2% un-buffered UA and viewed under the electron microscope. As  
18 negative control, anti-BacM rabbit serum was used. To judge labelling, 200 randomly  
19 selected PilQ complexes of the sample and the negative control were scored for the presence  
20 of gold label.

#### 21 22 **Image Analysis and Particle Averaging.**

23 A total of 1605 single, double, or multiple PilQ complexes were selected using PyTom,  
24 classified through iterative multivariate statistical analysis (MSA), and aligned using a single  
25 reference dimer particle (105). For MSA, twelve eigenvectors were used to classify the  
26 particles into four separate classes, which were then aligned and averaged using the TOM  
27 toolbox programs (106).

#### 28 29 **Immunofluorescence (IF) Light Microscopy.**

30 *M. xanthus* were grown 24 h in the absence or presence of  $300\ \mu\text{M}$   $\text{CuSO}_4$  and adhered to  
31 sterile glass coverslips overnight in CTT media, with or without copper. Cells were then  
32 processed essentially as described (107). Briefly, cells were rinsed with PM buffer (20 mM  
33 Na-phosphate, 1 mM  $\text{MgSO}_4$ , pH 7.4) and fixed with 4% paraformaldehyde in PM buffer.  
34 Cells were permeabilized with 0.2% Triton X-100 and 1 mg/ml lysozyme, and probed with  
35 affinity purified anti-GspD antibody at a 1:10 dilution in PBS buffer with 2% BSA.  
36 Secondary antibody was Alexa<sub>594</sub>-conjugated anti-rabbit (Life Technologies, Carlsbad, CA)  
37 diluted 1:1000 in PBS with 2% BSA. Cells were stained with 1  $\mu\text{g}/\text{ml}$  DAPI, and examined  
38 with a Nikon Eclipse 90i microscope with a  $100\times/\text{NA}$  1.4 phase-contrast oil immersion  
39 objective (Nikon, Melville, NY). Images were collected with an ORCA ER CCD camera  
40 (Hamamatsu, Bridgewater, NJ) and processed using Volocity (PerkinElmer, Waltham, MA).

41  
42 For *O. lutea*, actively growing and motile cell filaments were collected, washed in  $\text{ddH}_2\text{O}$ ,  
43 and left at  $4^{\circ}\text{C}$  overnight to allow autolysis. For *Ph. autumnale*, actively growing and motile  
44 cell filaments were collected, washed in BG11 medium, and incubated at  $50^{\circ}\text{C}$  for 14 hours.  
45 For both, cells were then treated with 0.2 M Glycine buffer at pH 2.5 for 15 min at RT. After  
46 thorough washing in 20 mM HEPES at pH 8, cells were air-dried onto poly-L-lysine (PLL)-



1 coated coverslips and submerged in 70% ethanol at -25 °C for 30 minutes for fixation.  
2 Coverslips were washed in PBS thoroughly and blocked in PBS containing 2% BSA and  
3 0.5% Tween-20 at RT. Coverslips were placed cell-face down onto 100 µl drops of primary  
4 anti-PilQ at 1:600 dilutions in blocking buffer at RT. After one hour, coverslips were washed  
5 in blocking buffer, and further labelled with Alexa Fluor 488-conjugated secondary  
6 antibodies (Invitrogen, Carlsbad, CA) for one hour at RT as above. After washing, coverslips  
7 were mounted with SlowFade Gold antifade mountant (Molecular Probes, Carlsbad, CA)  
8 and sealed with nail polish. Imaging was performed with a Nikon Eclipse Ti inverted  
9 fluorescence microscope using the Nikon Plan Apo 100× Ph oil (NA 1.45) objective. This  
10 was equipped with the Andor Zyla sCMOS camera (Andor, Belfast, NI). Image acquisition  
11 was controlled using NIS Elements AR 4.2 imaging software (Nikon Instruments,  
12 Netherlands). Images were visualized and analyzed with FIJI (110).  
13

#### 14 **Fluorescence Imaging of EPS Secretion.**

15 Actively motile *O. lutea* or *Ph. autumnale* cell filaments were collected and washed in BG11  
16 media. The filaments were subjected to brief sonication (<1 second) at low power or cut into  
17 short fragments using razor blades. They were transferred to an ice-cold solution of BG11  
18 with 10µg/ml of Alexa Fluor 488-conjugated concanavalin A (Invitrogen, Carlsbad, CA).  
19 Imaging was performed in a temperature regulated chamber set to 28°C, using the same  
20 microscope for the IF imaging of *O. lutea* and *Ph. autumnale* described above. Cells were  
21 seeded into an ibidi PLL-treated µ-Slide VI<sup>0.4</sup> flow channel slide (ibidi, Gräfelfing,  
22 Germany) and allowed to settle for 5 minutes. BG11 was flowed through at >0.5 ml/s to  
23 remove excess concanavalin A, and to encourage dissociation of slime bands from cell  
24 surfaces.  
25

#### 26 **Serial Dilution Growth Assay.**

27 To test the requirement for copper for growth of the *M. xanthus* strains, cells were grown  
28 overnight in CTT media with 200 µM CuSO<sub>4</sub> at 32 °C. Cells were sub-cultured into CTT  
29 media with lacking copper, but with 200 µM of the copper chelator bathocuproinedisulfonic  
30 acid (BCS, Sigma-Aldrich, St. Louis, MO) and grown for 24 h at 32 °C. These cells were  
31 again sub-cultured into media with 200 µM BCS and grown for an additional 24 h at 32 °C.  
32 Cells were concentrated to 1 × 10<sup>9</sup> cells/ml in CTT and four 4-fold serial dilutions were  
33 prepared. Three microliters of each cell suspension were spotted on CTT plates with 1.5%  
34 agar, containing either 200 µM BCS, 100 µM CuSO<sub>4</sub>, or 500 µM CuSO<sub>4</sub>, dried, and  
35 incubated at 32 °C for 48 h.  
36

#### 37 **Motility Assays.**

38 For adventurous motility assays, mutant *M. xanthus* cells were grown overnight in liquid  
39 culture containing 200 µM CuSO<sub>4</sub> at 32 °C. Cells were then sub-cultured into media  
40 containing 200 µM BCS and grown for 24 h at 32 °C. Wildtype and  $\Delta pilA$  cells were grown  
41 overnight in the absence of copper. Cells were diluted to 1 × 10<sup>8</sup> cells/ml in CTT, and 10 µl  
42 were spotted onto 1/2× CTT plates with 1.5% agar, and either 200 µM BCS or 300 µM  
43 CuSO<sub>4</sub>. Spots were dried and plates were incubated for 48 h at 32 °C. Swarm edges were  
44 examined with a Nikon Inverted TE200 microscope, using a 10× objective, and digital  
45 images were collected with a SPOT RT camera and SPOT Basic software (Diagnostic  
46 Instruments, Inc., Sterling Heights, MI).

1

2

3

### **Acknowledgments**

4 We thank the W. Harry Feinstone Department of Molecular Microbiology and Immunology  
5 at the Johns Hopkins Bloomberg School of Public Health for generous support during the  
6 initial phase of this investigation, members of the Hoiczky laboratory for helpful discussions  
7 and comments on the work and the manuscript, Colleen McHugh and Harriet Pratley for the  
8 generation of GspD/PilQ antisera, José Muñoz-Dorado for providing plasmids for copper-  
9 inducible gene expression, Daniel Bollschweiler, Florian Beck, and Harald Engelhardt (MPI  
10 of Biochemistry, Martinsried) for their help with averaging the isolated *A. platensis* GspD  
11 complexes, Christopher Hill for help with the immunogold labeling and high pressure  
12 freezing, and Carolyn Machamer for providing research space for D.M.Z. Mass spectrometry  
13 analyses were performed by the biOMICS/chemMS Facility of the Faculty of Science Mass  
14 Spectrometry Centre at the University of Sheffield (*O. lutea*, *Ph. autumnale* and *A.*  
15 *spirulina*) and the Mass Spectrometry & Proteomics Resource Core at Harvard University  
16 (*A. spirulina*). This research was funded in part by a National Institutes of Health General  
17 Medicine Grant (GM85024 to E.H.), a Forschungsstipendium of the Max Planck Society (to  
18 E.H.), a National Institutes of Health Infectious Disease and Immunology Training Grant (to  
19 D.M.Z.), and a National Science Foundation Grant (1949762 to D.M.Z.). In addition, E.H.,  
20 J.M.T.S., and D.M.Z. acknowledge support from the Imagine: Imaging Life initiative of the  
21 University of Sheffield.

22

23

1 **References**

- 2  
3 1. T. R. D. Costa et al., Secretion systems in Gram-negative bacteria: structural and  
4 mechanistic insights. *Nat Rev Microbiol* **13**, 343-359 (2015).  
5  
6 2. E. J. Stoop, W. Bitter, A. M. van der Sar, Tubercle bacilli rely on a type VII army for  
7 pathogenicity. *Trends Microbiol* **20**, 477-484 (2012).  
8  
9 3. M. J. McBride, Y. Zhu, Gliding motility and Por secretion system genes are widespread  
10 among members of the phylum *Bacteroidetes*. *J Bacteriol* **195**, 270-278 (2013).  
11  
12 4. A. Konovalova, D. E. Kahne, T. J. Silhavy, Outer membrane biogenesis. *Annu Rev*  
13 *Microbiol* **71**, 539-556 (2017).  
14  
15 5. N. Ruiz, D. Kahne, T. J. Silhavy, Transport of lipopolysaccharide across the cell  
16 envelope: the long road of discovery. *Nat Rev Microbiol* **7**, 677-683 (2009).  
17  
18 6. A. Ilangovan, S. Connery, G. Waksman, Structural biology of the Gram-negative bacterial  
19 conjugation systems. *Trends Microbiol* **23**, 301-310 (2015).  
20  
21 7. J. C. Whitney, P. L. Howell, Synthase-dependent exopolysaccharides secretion in Gram-  
22 negative bacteria. *Trends Microbiol* **21**, 63-72 (2013).  
23  
24 8. P. J. Christie, The rich tapestry of protein translocation systems. *Protein J* **38**, 389-408  
25 (2019).  
26  
27 9. N. Bayan, I. Guilvout, A. P. Pugsley, Secretins take shape. *Mol Microbiol* **60**, 1-4 (2006).  
28  
29 10. K. V. Korotkov, T. Gonen, W. G. J. Hol, Secretins: dynamic channels for protein  
30 transport across membranes. *Trends Biochem Sci* **36**, 433-443 (2011).  
31  
32 11. T. Tosi et al., Structural similarity of secretins from type II and type III secretion  
33 systems. *Structure* **22**, 1348-1355 (2014).  
34  
35 12. N. Opalka et al., Structure of the filamentous phage IV multimer by cryo-electron  
36 microscopy. *J Mol Biol* **325**, 461-470 (2003).  
37  
38 13. V. Pelicic, Type IV pili: e pluribus unum? *Mol Microbiol* **68**, 827-837 (2008).  
39  
40 14. K. V. Korotkov, M. Sandkvist, W. G. J. Hol, The type II secretion system: biogenesis,  
41 molecular architecture and mechanism. *Nat Rev Microbiol* **10**, 336-351 (2012).  
42  
43 15. S. Jain et al., Structural characterization of outer membrane components of the type IV  
44 pili system in pathogenic *Neisseria*. *PLoS One* **6**, e16624 (2011).  
45

- 1 16. S. R. Thomas, T. J. Trust, A specific PulD homolog is required for the secretion of  
2 paracrystalline surface array subunits in *Aeromonas hydrophila*. *J Bacteriol* **177**, 3932-3939  
3 (1995).  
4
- 5 17. P. Abrusci, M. A. McDowell, S. M. Lea, S. Johnson, Building a secreting nanomachine:  
6 a structural overview of the T3SS. *Curr Opin Struct Biol* **25**, 111-117 (2014).  
7
- 8 18. E. D’Imprima et al., Cryo-EM structure of the bifunctional secretin complex of *Thermus*  
9 *thermophilus*. *eLife* **6**, e30483 (2017).  
10
- 11 19. V. Viarre et al., HxcQ liposecretin is self-piloted to the outer membrane by its N-  
12 terminal lipid anchor. *J Biol Chem* **284**, 33815-33823 (2009).  
13
- 14 20. J. Koo, L. L. Burrows, L. Howell, Decoding the roles of pilotins and accessory proteins  
15 in secretin escort services. *FEMS Microbiol Lett* **328**, 1-12 (2012).  
16
- 17 21. S. Genin, C. A. Boucher, A superfamily of proteins involved in different secretion  
18 pathways in Gram-negative bacteria: modular structure and specificity of the N-terminal  
19 domain. *Mol Gen Genet* **243**, 112-118 (1994).  
20
- 21 22. S. L. Reichow, K. V. Korotkov, W. G. Hol, T. Gonen, Structure of the cholera toxin  
22 secretion channel in its closed state. *Nat Struct Mol Biol* **17**, 1226-1232 (2010).  
23
- 24 23. K. V. Korotkov, E. Pardon, J. Streyart, W. G. J. Hol, Crystal structure of the N-terminal  
25 domain of the secretin GspD from ETEC determined with the assistance of a nanobody.  
26 *Structure* **17**, 255-265 (2009).  
27
- 28 24. T. C. Marlovits et al., Structural insights into the assembly of the type III secretion  
29 needle complex. *Science* **306**, 1040-1042 (2004).  
30
- 31 25. J. Spagnuolo et al., Identifications of the gate regions in the primary structure of the  
32 secretin pIV. *Mol Microbiol* **76**, 133-150 (2010).  
33
- 34 26. C. Whitfield, Biosynthesis and assembly of capsular polysaccharides in *Escherichia coli*.  
35 *Annu Rev Biochem* **75**, 39-68 (2006).  
36
- 37 27. B. H. A. Rehm, Bacterial polymers: biosynthesis, modifications and applications. *Nat*  
38 *Rev Microbiol* **8**, 578-592 (2010).  
39
- 40 28. C. Whitfield, S. S. Wear, C. Sande, Assembly of bacterial capsular polysaccharides and  
41 exopolysaccharides. *Annu Rev Microbiol* **74**, 521-543 (2020).  
42
- 43 29. P. V. Toukach, K. S. Egorova, Carbohydrate structure database merged from bacterial,  
44 archaeal, plant and fungal parts. *Nucl Acids Res* **44(D1)**, D1229-D1236.  
45

- 1 30. G. Skjåk-Bræk, F. Zanetti, S. Paoletti, Effect of acetylation on some solution and gelling  
2 properties of alginates. *Carbohydr Res* **185**, 131-138 (1989).  
3
- 4 31. M. J. Franklin et al., *Pseudomonas aeruginosa* AlgG is a polymer level alginate C5-  
5 mannuronan epimerase. *J Bacteriol* **176**, 1821-1830 (1994).  
6
- 7 32. M. Pérez-Burgos, L. Søgaaard-Andersen, Biosynthesis and function of cell-surface  
8 polysaccharides in the social bacterium *Myxococcus xanthus*. *Biol Chem* **401**, 1375-1387  
9 (2020).  
10
- 11 33. J. Drummelsmith, C. Whitfield, Translocation of group 1 capsular polysaccharide to the  
12 surface of *Escherichia coli* (O9a:K30) requires a multimeric complex in the outer  
13 membrane. *EMBO J* **19**, 57-66 (2000).  
14
- 15 34. S. D. Liston, E. Mann, C. Whitfield, Glycolipid substrates for ABC transporters required  
16 for the assembly of bacterial cell-envelope and cell-surface glycoconjugates. *Biochim*  
17 *Biophys Acta Mol Cell Biol Lipids* **1862**, 1394-1403 (2017).  
18
- 19 35. I. T. Paulsen, A. M. Beness, M. H. J. Saier, Computer-based analyses of the protein  
20 constituents of transport systems catalyzing export of complex carbohydrates in bacteria.  
21 *Microbiol* **143**, 2685-2699 (1997).  
22
- 23 36. L. Cuthbertson, I. L. Mainprize, J. H. Naismith, C. Whitfield, Pivotal roles of the outer  
24 membrane polysaccharide export and polysaccharide copolymerase protein families in  
25 export of exopolysaccharides in Gram-negative bacteria. *Microbiol Mol Biol Rev* **73**, 155-  
26 177 (2009).  
27
- 28 37. R. Morona, L. Purins, A. Tocilj, A. Matte, M. Cygler, Sequence-structure relationships  
29 in polysaccharide co-polymerase (PCP) proteins. *Trends Biochem Sci* **34**, 78-84 (2009).  
30
- 31 38. C. Dong et al., Wza, the translocon for *E. coli* capsular polysaccharides, defines a new  
32 class of membrane protein. *Nature* **444**, 226-229 (2006).  
33
- 34 39. K. Sathiyamoorthy, E. Mills, T. M. Franzmann, I. Rosenshine, M. A. Saper, The crystal  
35 structure of *Escherichia coli* group 4 capsule protein GfcC reveals a domain organization  
36 resembling that of Wza. *Biochemistry* **50**, 5465-5476 (2011).  
37
- 38 40. M. R. Larson et., *Escherichia coli* O127 group 4 capsule proteins assemble at the outer  
39 membrane. *PLoS One* **16**, e0259900 (2021).  
40
- 41 41. B. Wiseman, R.G. Nitherwal, G. Widmalm, M. Högbom, Structure of a full-length  
42 bacterial polysaccharide co-polymerase. *Nat Commun* **12**, 369 (2021).  
43
- 44 42. Y. Yang et al., The molecular basis of regulation of bacterial capsule assembly by Wzc.  
45 *Nat Commun* **12**, 4349 (2021).  
46

- 1 43. U. Romling, Molecular biology of cellulose production in bacteria. *Res Microbiol* **153**,  
2 205-212 (2002).  
3
- 4 44. I. D. Hay, Y. Wang, M. F. Moradali, Z. U. Rehman, B. H. Rehm, Genetics and  
5 regulation of bacterial alginate production. *Environ Microbiol* **16**, 2997-3011 (2014).  
6
- 7 45. Y. Itoh et al., Roles of the *pgaABCD* genes in synthesis, modification, and export of the  
8 *Escherichia coli* biofilm adhesin poly- $\beta$ -1,6-*N*-acetyl-D-glucosamine. *J Bacteriol* **190**, 3670-  
9 3680 (2008).  
10
- 11 46. C. Hubbard, J. T. McNamara, C. Azumaya, M. S. Patel, J. Zimmer, The hyaluronan  
12 synthase catalyzes the synthesis and membrane translocation of hyaluronan. *J Mol Biol* **418**,  
13 21-31 (2012).  
14
- 15 47. P. Ross et al., Regulation of cellulose synthesis in *Acetobacter xylinum* by cyclic  
16 diguanylic acid. *Nature* **325**, 279-281 (1987).  
17
- 18 48. C. L. Keiski et al., AlgK is a TPR-containing protein and the periplasmic component of a  
19 novel exopolysaccharides secretin. *Structure* **18**, 265-273 (2010).  
20
- 21 49. J. C. Whitney et al., Structural basis for alginate secretion across the bacterial outer  
22 membrane. *Proc Natl Acad Sci USA* **108**, 13083-13088 (2011).  
23
- 24 50. H. Reichenbach, M. Dworkin, Introduction to the gliding bacteria. *The prokaryotes Vol.*  
25 *1*, eds M. P. Starr, H. Stolp, H. G. Trüper, A. Balows, H. G. Schlegel (Springer Press, Berlin,  
26 Heidelberg, New York) pp. 315-327 (1981).  
27
- 28 51. E. Hoiczyk, W. Baumeister, The junctional pore complex, a prokaryotic secretion  
29 organelle, is the molecular motor underlying gliding motility in cyanobacteria. *Curr Biol* **8**,  
30 1161-1168 (1998).  
31
- 32 52. C. Wolgemuth, E. Hoiczyk, D. Kaiser, G. Oster, How myxobacteria glide. *Curr Biol* **12**,  
33 369-377 (2002).  
34
- 35 53. B. Nan, D. R. Zusman, Uncovering the mystery of gliding motility in the myxobacteria.  
36 *Annu Rev Genet* **45**, 21-39 (2011).  
37
- 38 54. A. Ducret, M. P. Valignat, F. Mouhamar, T. Mignot, O. Theodoly, Wet-surface-  
39 enhanced ellipsometric contrast microscopy identifies slime as a major adhesion factor  
40 during bacterial surface motility. *Proc Natl Acad Sci USA* **109**, 10036-10041 (2012).  
41
- 42 55. E. Hoiczyk, W. Baumeister, Envelope structure of four gliding filamentous  
43 cyanobacteria. *J Bacteriol* **177**, 2387-2395 (1995).  
44
- 45 56. E. Hoiczyk, Gliding motility in cyanobacteria: observations and possible explanations.  
46 *Arch Microbiol* **174**, 11-17 (2000).



- 1  
2 57. W. Nultsch, D.-P. Häder, Über die Rolle der beiden Photosysteme in der  
3 Photophobotaxis von *Phormidium uncinatum*. *Ber Dtsch Bot Ges* **87**, 83-92 (1974).  
4  
5 58. A. Belay, Mass culture of *Spirulina* outdoors - the earthrise farms experience. *Spirulina*  
6 *platensis* (*Arthrospira*): *physiology, cell-biology and biotechnology*, ed A. Vonshak (Francis  
7 & Taylor, London), pp. 131-158 (1997).  
8  
9 59. K. Ohmori, M. Hirose, M. Ohmori, Function of cAMP as mat-forming factor in the  
10 cyanobacterium *Spirulina platensis*. *Plant Cell Physiol* **33**, 21-25 (1992).  
11  
12 60. A. E. Walsby, Mucilage secretion and the movement of blue-green algae. *Protoplasma*  
13 **65**, 223-238 (1968).  
14  
15 61. K. Black, W. Buikema, R. Haselkorn, The *hglK* gene is required for localization of  
16 heterocyst-specific glycolipids in the cyanobacterium *Anabaena* sp. strain PCC7120. *J*  
17 *Bacteriol* **177**, 6440-6448 (1995).  
18  
19 62. E. Hoiczky, W. Baumeister, Oscillin, an extracellular, Ca<sup>2+</sup>-binding glycoprotein  
20 essential for the gliding motility of cyanobacteria. *Mol Microbiol* **26**, 699-708 (1997).  
21  
22 63. E. Hoiczky, A. Hansel, Cyanobacterial cell walls: news from an unusual prokaryotic  
23 envelope. *J Bacteriol* **182**, 1191-1199 (2000).  
24  
25 64. K. K. Mehta, N. H. Evitt, J. R. Swartz, Chemical lysis of cyanobacteria. *J Biol Eng* **9**, 10  
26 (2015).  
27  
28 65. D. Kaiser, Social gliding is correlated with the presence of pili in *Myxococcus xanthus*.  
29 *Proc Natl Acad Sci USA* **76**, 5952-5956 (1979).  
30  
31 66. D. Wall, P. E. Kohlenbrander, D. Kaiser, The *Myxococcus xanthus pilQ* (*sglA*) gene  
32 encodes a secretin homolog required for type IV pilus biogenesis, social motility, and  
33 development. *J Bacteriol* **181**, 24-33 (1999).  
34  
35 67. Y.-W. Chang et al., Architecture of the type IVa pilus machine. *Science* **351**, aad2001  
36 (2016).  
37  
38 68. D. M. Zuckerman, S. W. Hicks, G. Charron, H. C. Hang, C. E. Machamer, Differential  
39 regulation of two palmitoylation sites in the cytoplasmic tail of the beta1-adrenergic  
40 receptor. *J Biol Chem*. **286**, 19014-19023 (2011).  
41  
42 69. N. Gómez-Santos et al., Comprehensive set of integrative plasmid vectors for copper-  
43 inducible gene expression in *Myxococcus xanthus*. *Appl Environ Microbiol* **78**, 2515-2521  
44 (2012).  
45



- 1 70. R. Yu, D. Kaiser, Gliding motility and polarized slime secretion. *Mol Microbiol* **63**, 454-  
2 467 (2007).  
3
- 4 71. W. Fluegel, Simple method for demonstrating myxobacterial slime. *J Bacteriol* **85**, 1173-  
5 1174 (1963).  
6
- 7 72. A. E. Pelling, Y. Li, W. Shi, J. K. Gimzewski, Nanoscale visualization and  
8 characterization of *Myxococcus xanthus* cells with atomic force microscopy. *Proc Natl Acad*  
9 *Sci USA* **102**, 6484-6489 (2005).  
10
- 11 73. M. Dworkin, Fibrils as extracellular appendages of bacteria: their role in contact-  
12 mediated cell-cell interactions in *Myxococcus xanthus*. *Bioessays* **21**, 590-595 (1999).  
13
- 14 74. H. Palsdottir et al., Three-dimensional macromolecular organization of cryofixed  
15 *Myxococcus xanthus* biofilms as revealed by electron microscopic tomography. *J Bacteriol*  
16 **191**, 2077-2082 (2009).  
17
- 18 75. J. P. Remis et al., Bacterial social networks: structure and composition of *Myxococcus*  
19 *xanthus* outer membrane vesicle chains. *Environ Microbiol* **16**, 598-610 (2013).  
20
- 21 76. B. Nan, M. J. McBride, J. Chen, D. R. Zusman, G. Oster, Bacteria that glide with helical  
22 tracks. *Curr Biol* **24**, R169-173 (2014).  
23
- 24 77. P. L. Hartzell, W. Shi, P. Youderian, Gliding motility of *Myxococcus xanthus*.  
25 *Myxobacteria: multicellularity and differentiation*, ed D. E. Whitworth (ASM Press,  
26 Washington DC), pp. 103-122 (2008).  
27
- 28 78. J. W. Costerton, G. G. Geesey, K. J. Cheng, How bacteria stick. *Sci Am* **238**, 86-95  
29 (1978).  
30
- 31 79. J. W. Costerton, P. S. Stewart, E. P. Greenberg, Bacterial biofilms: a common cause of  
32 persistent infections. *Science* **284**, 1318-1322 (1999).  
33
- 34 80. H. C. Flemming, J. Wingender, The biofilm matrix. *Nat Rev Microbiol* **8**, 623-633  
35 (2010).  
36
- 37 81. M. Otto, Physical stress and bacterial colonization. *FEMS Microbiol Rev* **38**, 1250-1270  
38 (2014).  
39
- 40 82. L. Hall-Stoodley, J. W. Costerton, P. Stoodley, Bacterial biofilms: from the natural  
41 environment to infectious diseases. *Nat Rev Microbiol* **2**, 95-108 (2004).  
42
- 43 83. P. S. Stewart, M. J. Franklin, Physiological heterogeneity in biofilms. *Nat Rev Microbiol*  
44 **6**, 199-210 (2008).  
45

- 1 84. T. Danhorn, C. Fuqua, Biofilm formation by plant-associated bacteria. *Annu Rev*  
2 *Microbiol* **61**, 401-422 (2007).
- 3
- 4 85. D. Lebeaux, J. M. Ghigo, C. Beloin, Biofilm-related infections: bridging the gap between  
5 clinical management and fundamental aspects of recalcitrant towards antibiotics. *Microbiol*  
6 *Mol Biol Rev* **78**, 510-543 (2014).
- 7
- 8 86. A. Bateman, A. G. Murzin, S. A. Teichmann, Structure and distribution of pentapeptide  
9 repeats in bacteria. *Protein Sci* **7**, 1477-1480 (1998).
- 10
- 11 87. M. A. Andrade, C. Perez-Iratxeta, C. P. Pointing, Protein repeats: structures, functions,  
12 and evolution. *J Struct Biol* **134**, 117-131 (2001).
- 13
- 14 88. B. Khayatan, J. C. Meeks, D. D. Risser, Evidence that a modified type IV pilus-like  
15 system powers gliding motility and polysaccharide secretion in filamentous cyanobacteria.  
16 *Mol Microbiol* **98**, 1021-1036 (2015).
- 17
- 18 89. G. Guglielmi, G. Cohen-Bazire, Comparative study of the structure and distribution of  
19 extracellular filaments (fimbriae) in some cyanobacteria. *Protistologica* **18**, 167-177 (1982).
- 20
- 21 90. L. N. Halfen, R. W. Castenholz, Gliding in a blue-green alga: a possible mechanism.  
22 *Nature* **225**, 1163-1165 (1970).
- 23
- 24 91. J. E. Berleman, J. R. Kirby, Deciphering the hunting strategy of a bacterial wolfpack.  
25 *FEMS Microbiol Rev* **33**, 942-957 (2009).
- 26
- 27 92. G. J. Velicer, M. Vos, Sociobiology of the myxobacteria. *Annu Rev Microbiol* **63**, 599-  
28 623 (2009).
- 29
- 30 93. A. Konovalova, T. Petters, L. Søgaard-Andersen, Extracellular biology of *Myxococcus*  
31 *xanthus*. *FEMS Microbiol Rev* **34**, 89-106 (2010).
- 32
- 33 94. J. Kahnt et al., Profiling the outer membrane proteome during growth and development  
34 of the social bacterium *Myxococcus xanthus* by selective biotinylation and analysis of outer  
35 membrane vesicles. *J Proteome Res* **9**, 5197-5208 (2010).
- 36
- 37 95. H.-W. Pan et al., Seawater-regulated genes for two-components systems and outer  
38 membrane proteins in *Myxococcus*. *J Bacteriol* **191**, 2102-2111 (2009).
- 39
- 40 96. G. P. Sah, P. Cao, D. Wall, MYXO-CTERM sorting tag directs proteins to the cell  
41 surface via the type II secretion system. *Mol Microbiol* **113**, 1038-1051 (2020).
- 42
- 43 97. D. T. Pathak et al., Cell contact-dependent outer membrane exchange in myxobacteria:  
44 genetic determinants and mechanism. *PLoS Genetics* **8**, e1002626 (2012).
- 45

- 1 98. C. Y. Zhang et al., New locus important for *Myxococcus* social motility and  
2 development. *J Bacteriol* **189**, 7937-7941 (2007).  
3
- 4 99. B. F. Watson, M. Dworkin, Comparative intermediary metabolism of vegetative cells  
5 and microcysts of *Myxococcus xanthus*. *J Bacteriol* **96**, 1465-1473 (1968).  
6
- 7 100. E. Hoiczky, Structural and biochemical analysis of the sheath of *Phormidium*  
8 *uncinatum*. *J Bacteriol* **180**, 3923-3932 (1998).  
9
- 10 101. D. D. Risser, J. C. Meeks, Comparative transcriptomics with a motility-deficient mutant  
11 leads to identification of a novel polysaccharide secretion system in *Nostoc punctiforme*. *Mol*  
12 *Microbiol* **87**, 884-893 (2013).  
13
- 14 102. H. B. Rehm, G. Boheim, J. Tommassen, U. K. Winkler, Overexpression of *algE* in  
15 *Escherichia coli*: subcellular localization, purification, and ion channel properties. *J*  
16 *Bacteriol* **176**, 5639-5647 (1994).  
17
- 18 103. E. Disconzi et al., Bacterial secretins form constitutively open pores akin to general  
19 porins. *J Bacteriol* **196**, 121-128 (2014).  
20
- 21 104. E. S. Reynolds, The use of lead citrate at high pH as an electron-opaque stain for  
22 electron microscopy. *J Cell Biol* **17**, 208-212 (1963).  
23
- 24 105. T. Hrabe et al., PyTom: A python-based toolbox for localization of macromolecules in  
25 cryo-electron tomograms and subtomogram analysis. *J Struct Biol* **178**, 177-188 (2012).  
26
- 27 106. S. Nickel et al., TOM software toolbox: Acquisition and analysis for electron  
28 tomography. *J Struct Biol* **149**, 227-234 (2005).  
29
- 30 107. M. K. Koch, C. A. McHugh, E. Hoiczky, BacM, an N-terminally processed bactofilin  
31 of *Myxococcus xanthus*, is crucial for cell shape. *Mol Microbiol* **80**, 1031-1051 (2011).  
32
- 33 108. P. Scheldeman et al., *Arthrospira* (“*Spirulina*”) strains from four continents are  
34 resolved into only two clusters, based on amplified ribosomal DNA restriction analysis of  
35 the internally transcribed spacer. *FEMS Microbiol Lett* **172**, 213-222 (1999).  
36
- 37 109. S. S. Wu, D. Kaiser, Markerless deletions of *pil* genes in *Myxococcus xanthus*  
38 generated by counterselection with the *Bacillus subtilis sacB* gene. *J Bacteriol* **178**, 5817-  
39 5821 (1996).  
40
- 41 110. J. Schindelin et al., Fiji: an open-source platform for biological-image analysis. *Nat.*  
42 *Methods* **9**, 676-682 (2012).

1 Figure Legends

2

3 **Fig. 1.**

4 PilQ forms the slime nozzle in filamentous cyanobacteria (A-C) Thin sections of high-  
5 pressure frozen *Athrospira platensis* cells show the tilted transpeptidoglycan channels  
6 harboring the nozzle apparatus (black arrows), which are arranged in a circumferential ring  
7 at each cross wall. (B), (C) High magnification micrographs from indicated regions in (A).  
8 To visualize more channels, (B) shows the same region of the next thin section from a series  
9 of sections of the area shown in (A). The black arrows indicate the position of the  
10 transpeptidoglycan channels that in cross sections are visible as small white dots (B) and in  
11 longitudinal sections as slightly angled less dark stained bands traversing the peptidoglycan  
12 at an angle of 30-40° relative to the septum (C). (D) Pt/C shadowing of an isolated outer  
13 membrane patch reveals the rows of nozzles (black arrow) consisting of the peripheral ring  
14 (16-18 nm) and a central pore (6-8 nm) which have identical dimensions as the top views of  
15 the isolated pores (black arrows) in (F). (E) Transmission electron microscope image of a  
16 negatively stained isolated nozzle preparation. Black arrows indicate individual double ring  
17 nozzles, while white arrows indicate linear arrays containing multiple nozzles. The length of  
18 an individual double nozzle is ca. 32 nm. (F) As has been observed for nozzles of other  
19 filamentous cyanobacteria, adsorption to grids without glow discharge reveals top views of  
20 the complex (black arrows), while only a few side views are visible (white arrows)  
21 demonstrating that the cyanobacterial and myxobacterial nozzles (Fig. 3C) share similar  
22 architecture. (G) Fractions from a slime nozzle enrichment were screened by TEM and  
23 scored for how many nozzles were observed per grid square (ND, not determined). Fractions  
24 were separated by SDS-PAGE, and two bands correlated with fractions enriched for nozzles,  
25 identified as PilQ (black arrow higher mw band), and the pentapeptide repeat protein  
26 NIES39\_A07680 (black arrow lower mw band). (H) Immunogold labeling of isolated PilQ  
27 nozzles showing overall labeling (black arrows) and binding of the 5 nm gold-labeled  
28 antibodies to individual nozzle complexes at higher magnification (white arrows in insets).  
29 Scale bars: (A) 1 µm; (B) 250 nm; (C-F) 200 nm; (H) 100 nm and 25 nm (insets).

30

31 **Fig. 2.**

32 Immunofluorescence microscopy of *Oscillatoria lutea* and *Phormidium autumnale* filaments  
33 showing the localization of PilQ at the cross walls where EPS is secreted. (A) A PilQ  
34 antibody labels the periphery of isolated disc-shaped cross walls due to remnants of nozzle-  
35 containing longitudinal cell wall still being attached after cell breakage (SI Appendix, Fig  
36 S4). (B) Following limited autolysis, clear circumferential labelling is observed at the cross  
37 walls of the *O. lutea* filament. The image series are Z-stacks representing bottom, center, and  
38 top of the filament. Filled and hollow arrow heads denote mature and nascent cross walls,  
39 respectively. (C) Fluorescent concanavalin A labelling of live, motile *O. lutea* filaments  
40 typically showed strong adhesion of slime strands to filament surfaces. (D) Under strong  
41 lateral flow, strands of slime could be dislodged, but the location of their source is difficult  
42 to discern due to high gliding speed of cells and rate of slime secretion. (E) By subjecting  
43 *Ph. autumnale* filaments to brief sonication and cooling, individual strands of concanavalin  
44 A-labelled slime (green) could be observed to emanate from the cross walls where PilQ  
45 nozzles are located. Here auto-fluorescence at the center of the cell filament is displayed in  
46 magenta to more clearly show cell boundaries in this species. The schematic drawing on the

1 left traces the outline of the cell filament (red) and the pattern of the lectin-labelled slime  
2 strands (cyan).  
3

4 **Fig. 3.**

5 Isolation and identification of GspD in *Myxococcus xanthus* (A) Electron micrograph of  
6 nozzle-like structures *in situ* in outer membrane fragments from *M. xanthus* at high  
7 magnification. (B) SDS-PAGE of the purified nozzle preparation showing the ~270 kDa  
8 band that is formed after heating highly concentrated samples of GspD at 70 °C. Lane 2,  
9 biochemical fraction lacking nozzles (as evaluated by electron microscopy). Lane 3,  
10 biochemical fraction containing nozzles. Arrow indicates protein band unique to fractions  
11 enriched for nozzle-like structures, and identified as GspD (SI Appendix, Table 1). No other  
12 protein was consistently found to co-purify with nozzle-like structures in these isolations.  
13 (C) Electron micrograph of a purified isolation of the 14-16 nm wide ring-shaped nozzle  
14 complexes formed by GspD. Scale bars: (A, C) 100 nm.  
15

16 **Fig. 4.**

17 *gspD* is an essential gene in *Myxococcus xanthus* (A) Immunoblotting reveals that removal  
18 of copper from the medium of a cell line expressing *gspD* under a copper-inducible promoter  
19 leads to a gradual decrease of GspD, which eventually stabilizes at a low but detectable  
20 level. GspD is visualized as a ~100 kDa band, and occasionally a second band at ~47 kDa.  
21 (B) Immunofluorescence microscopy shows that GspD signal is due to low-level expression  
22 of the protein in all cells. Cells were grown in the absence or presence of 0.3 mM CuSO<sub>4</sub> for  
23 24 h prior to fixation and imaging. Top panel, anti-GspD signal; bottom, merged image with  
24 anti-GspD (red), DAPI (blue), and phase contrast. (C) Plating of wild type cells and cells  
25 containing a copper-inducible version of GspD reveal that *gspD* is an essential gene. Cells  
26 pre-cultured in 0.2 mM CuSO<sub>4</sub> were shifted to culture lacking CuSO<sub>4</sub> for 48 h. Cells were  
27 then concentrated, and 4-fold serial dilutions were spotted on agar media containing the  
28 indicated concentration of CuSO<sub>4</sub>. In the absence of copper (left panel) the mutant strain  
29 fails to grow, while with increasing amounts of copper (intermediate concentration, middle  
30 panel; high concentrations, right panel) the cells grow at rates indistinguishable from the  
31 wild type.  
32

33 **Fig. 5.**

34 Depletion of *gspD* results in a reduction of the number of nozzles (A) Electron micrograph of  
35 negatively stained outer membrane fragments from disrupted cells, revealing few or  
36 numerous ring-shaped GspD complexes depending on the absence or presence of copper.  
37 The insets show representative areas of the outer membranes at higher magnification. Black  
38 arrows indicate GspD complexes. Scale bar, 100 nm. (B) Electron micrograph of  
39 representative cells in the absence or presence of copper. Cells that have very few GspD  
40 nozzles secrete little or no slime, while cells possessing normal numbers of GspD nozzles  
41 secrete easily detectable bands of slime. (C) Cells grown in 0.2 mM CuSO<sub>4</sub> were shifted to  
42 the indicated concentration of CuSO<sub>4</sub> for 24 h. Cells were allowed to swarm on grids, and  
43 visualized by electron microscopy. For each condition, at least 12 cells were scored for the  
44 number of slime trails emanating from the bodies of isolated cells with intact membranes.  
45 The mean number of slime trails per cell ± S.D. is presented. All concentrations are mM  
46 CuSO<sub>4</sub>. Scale bar, 500 nm.

1

2 **Fig. 6.**

3 GspD is required for adventurous (A-) motility in *Myxococcus xanthus*. Appearance of the  
4 swarm colonies and edges of wild type, *gspD* cells,  $\Delta pilA$ , and *gspD*  $\Delta pilA$  cells in the  
5 presence and absence of copper. Single cell-based A-motility, characterized by individual  
6 cells spreading from the colony edge outwards, can be observed in the wild type cells and  
7 the  $\Delta pilA$  cells, while the depletion of GspD abolishes this movement in the *gspD* and the  
8 *gspD*  $\Delta pilA$  cells, confirming that GspD is required for A-motility.

**Table 1. Bacterial strains used in this study**

| <b><u>Strain</u></b>                | <b><u>Relevant description</u></b>                                                                                                                                                                                                                                                         | <b><u>Source or reference</u></b> |
|-------------------------------------|--------------------------------------------------------------------------------------------------------------------------------------------------------------------------------------------------------------------------------------------------------------------------------------------|-----------------------------------|
| <b><i>Arthrospira platensis</i></b> |                                                                                                                                                                                                                                                                                            |                                   |
| LB 2340                             | Wild type                                                                                                                                                                                                                                                                                  | (108)                             |
| <b><i>Myxococcus xanthus</i></b>    |                                                                                                                                                                                                                                                                                            |                                   |
| DK1622                              | Wild type                                                                                                                                                                                                                                                                                  | (65)                              |
| DK10407                             | [DK1622] $\Delta pilA$                                                                                                                                                                                                                                                                     | (109)                             |
| DK8615                              | [DK1622] $\Delta pilQ$                                                                                                                                                                                                                                                                     | (66)                              |
| EH098                               | [DK1622] $\Delta gspD$ $P_{cuoA}:gspD$ . Deletion of <i>gspD</i> at the chromosomal locus with complementation at the chromosomal <i>attB</i> site under control of the copper-inducible <i>cuoA</i> promoter. Tet <sup>R</sup> .                                                          | This study                        |
| EH099                               | [DK10407] $\Delta pilA$ $\Delta gspD$ $P_{cuoA}:gspD$ . Deletion of <i>gspD</i> at the chromosomal locus with complementation at the chromosomal <i>attB</i> site under control of the copper-inducible <i>cuoA</i> promoter in a social-motility defective background. Tet <sup>R</sup> . | This study                        |
| <b><i>E. coli</i></b>               |                                                                                                                                                                                                                                                                                            |                                   |
| BL 21 Star (DE3)                    | <i>E. coli</i> host for protein expression.                                                                                                                                                                                                                                                | Invitrogen                        |
| TOP10                               | <i>E. coli</i> host for plasmid maintenance.                                                                                                                                                                                                                                               | Invitrogen                        |



**Table 2. Plasmids used in this study**

| <b>Plasmids</b>                   | <b>Relevant description</b>                                                                                                                                                             | <b>Source or reference</b> |
|-----------------------------------|-----------------------------------------------------------------------------------------------------------------------------------------------------------------------------------------|----------------------------|
| pDMZ094                           | pBJ114 with deletion cassette for <i>gspD</i> .                                                                                                                                         | This study                 |
| pDMZ098                           | pMAT6 with $P_{cuoA}:gspD$ for introduction of <i>gspD</i> under the control of the copper inducible promoter.                                                                          | This study                 |
| pGEX- <i>gspD</i><br>(710-863)    | pGEX2T with codons 710-863 from <i>gspD</i> from <i>M. xanthus</i> . Used for protein expression of a GST-GspD (aa 710-863) fusion for affinity purification of the anti-GspD antibody. | This study                 |
| pET-DUET-1<br>-trGspD<br>(28-808) | pET-DUET-1 with codons 28-808 from <i>gspD</i> from <i>O. lutea</i> , inserted into the latter MCS. Used for protein expression of GspD for the generation of anti-GspD antibody.       | This study                 |

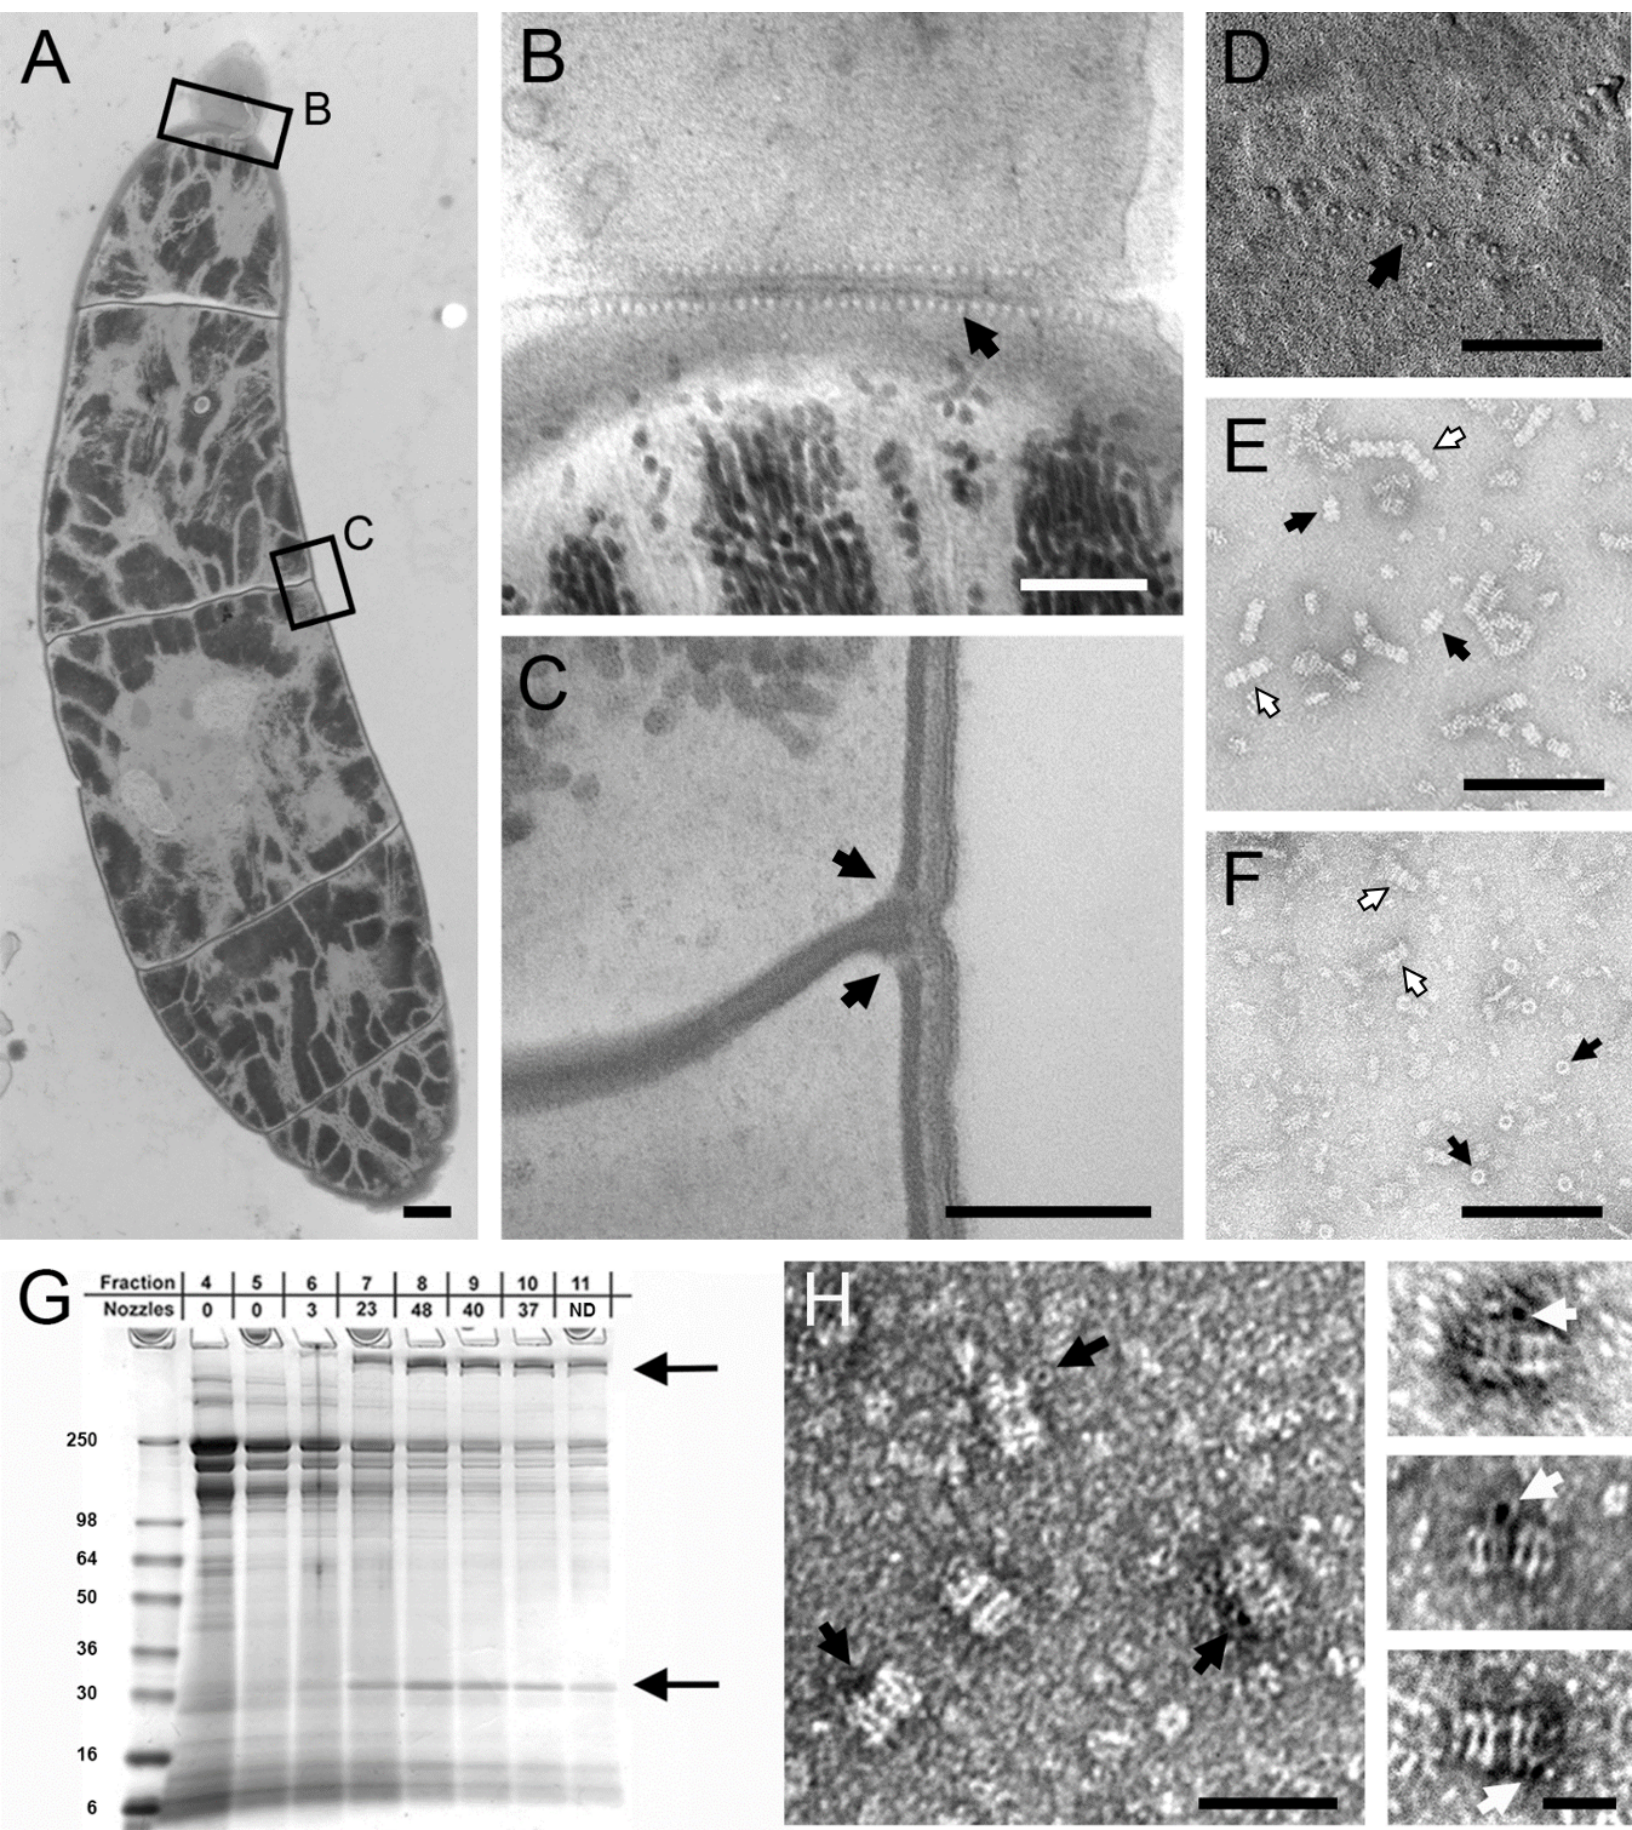



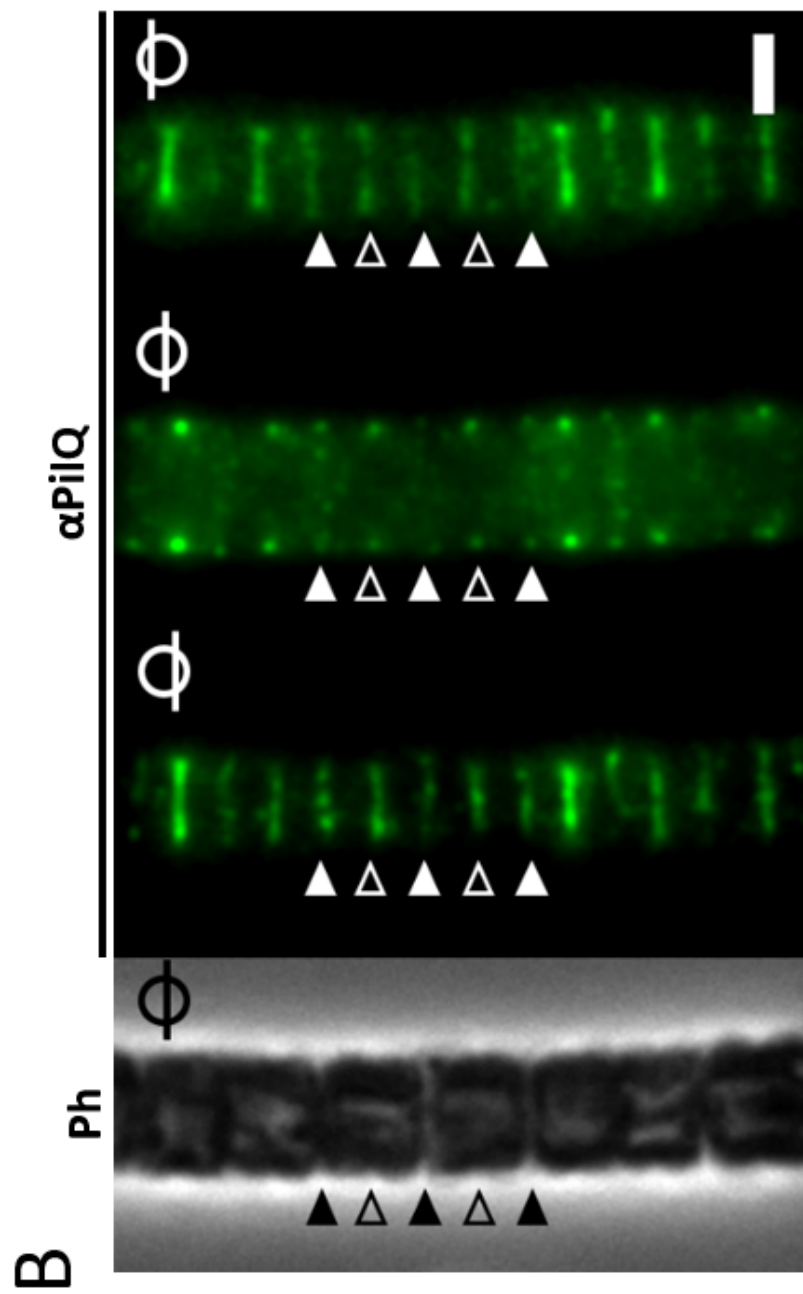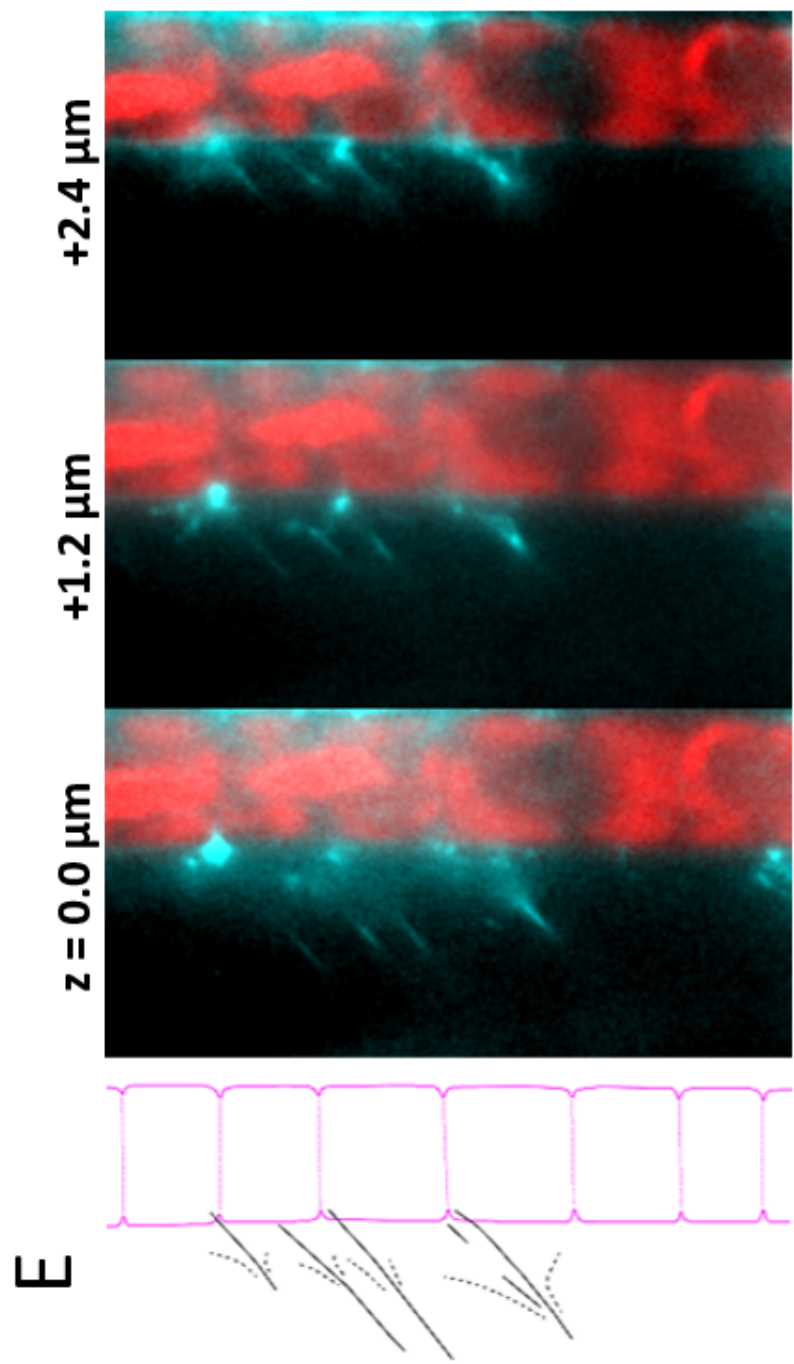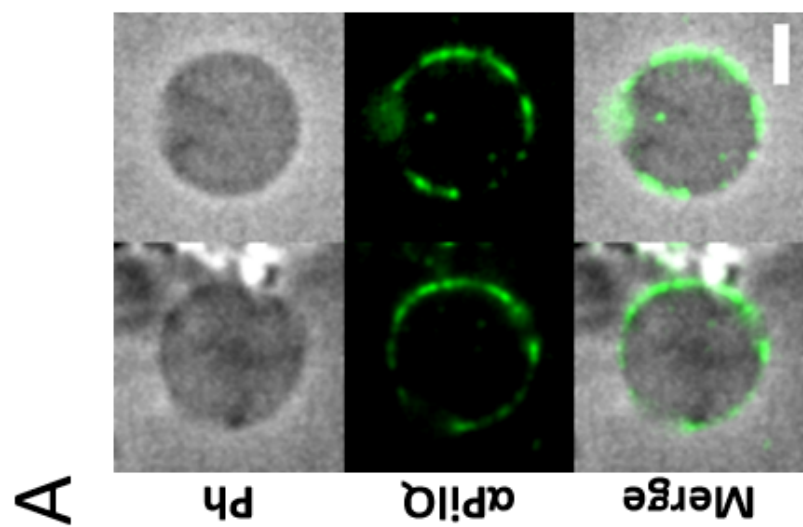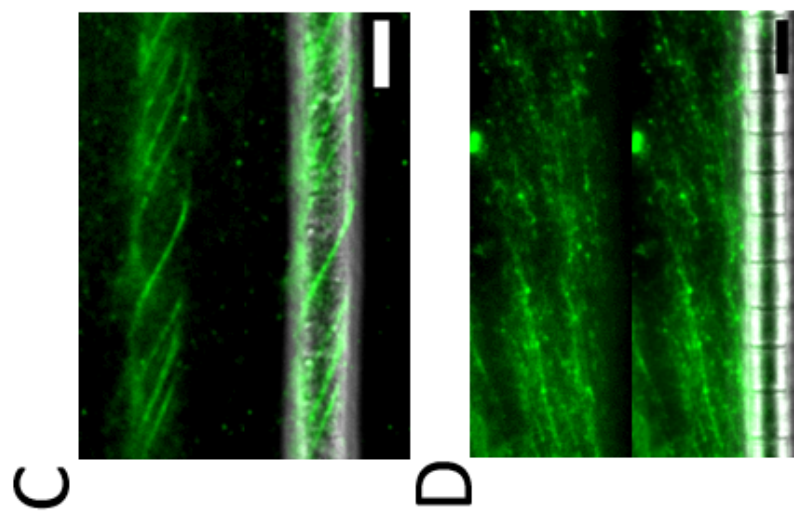

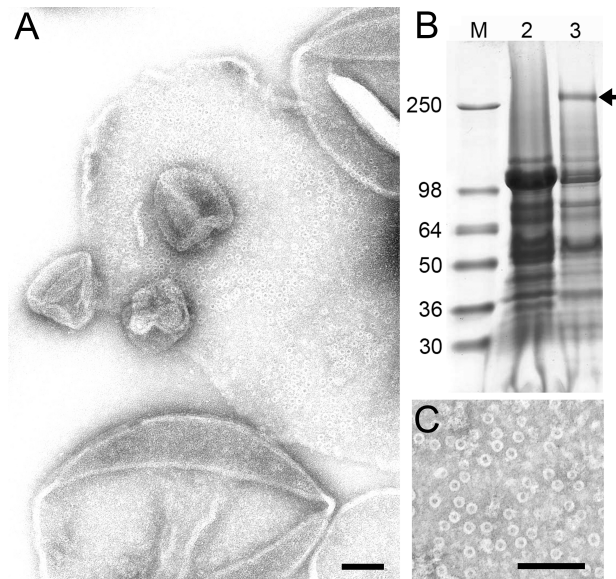

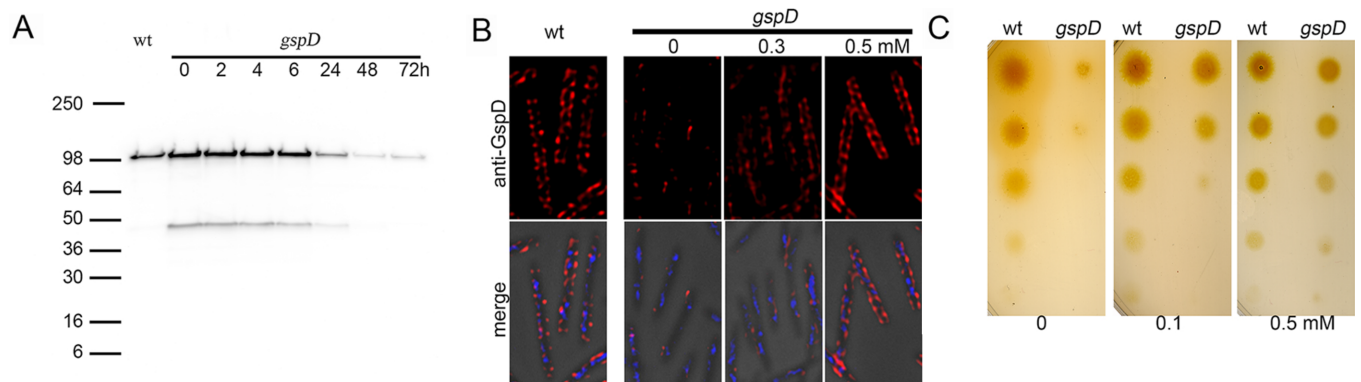

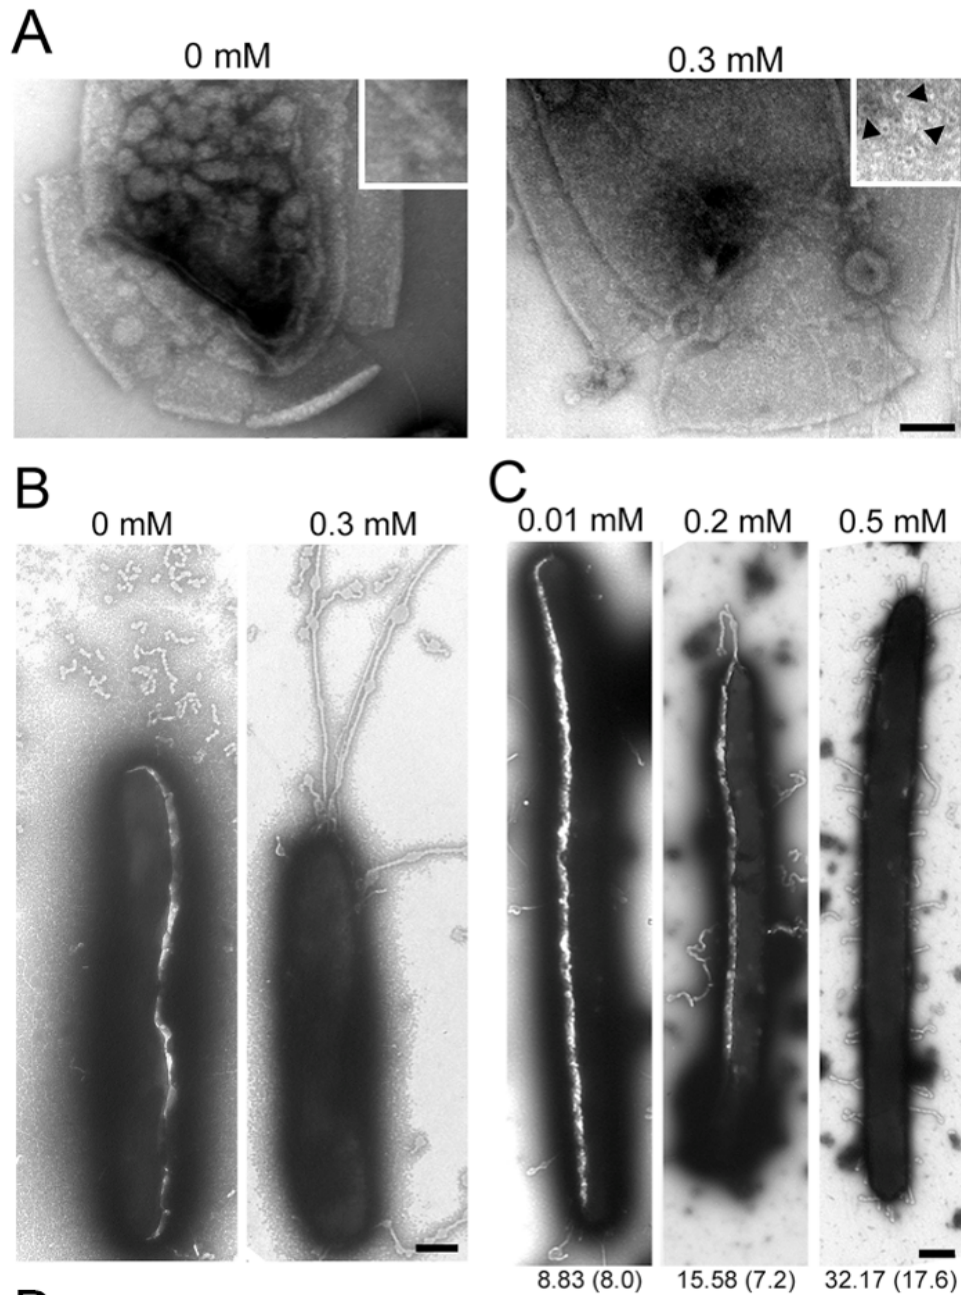



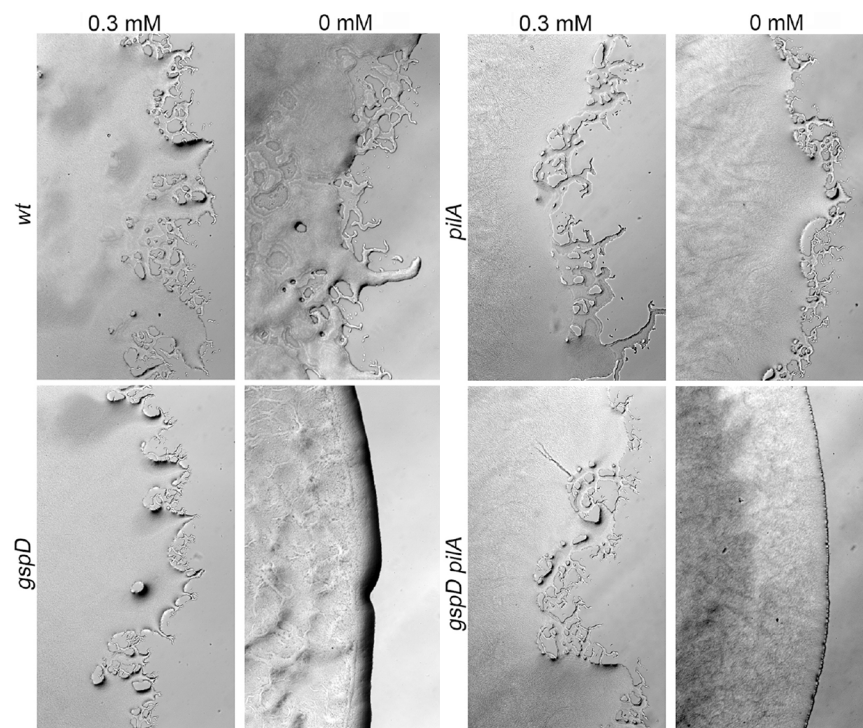

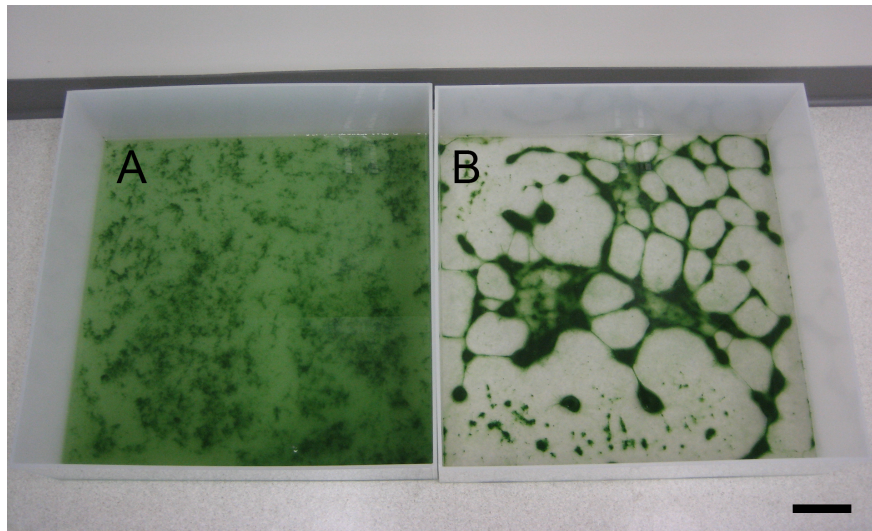

**Figure S1. Addition of cAMP to a culture of *Arthrospira platensis* (A) induces motility-dependent clumping (B), revealing the ability of the cells to glide.** As motility-dependent clumping is invariably correlated with slime secretion and nozzle presence in this species, clumping can be used to screen for the presence of nozzles. Scale bar, 10 cm.

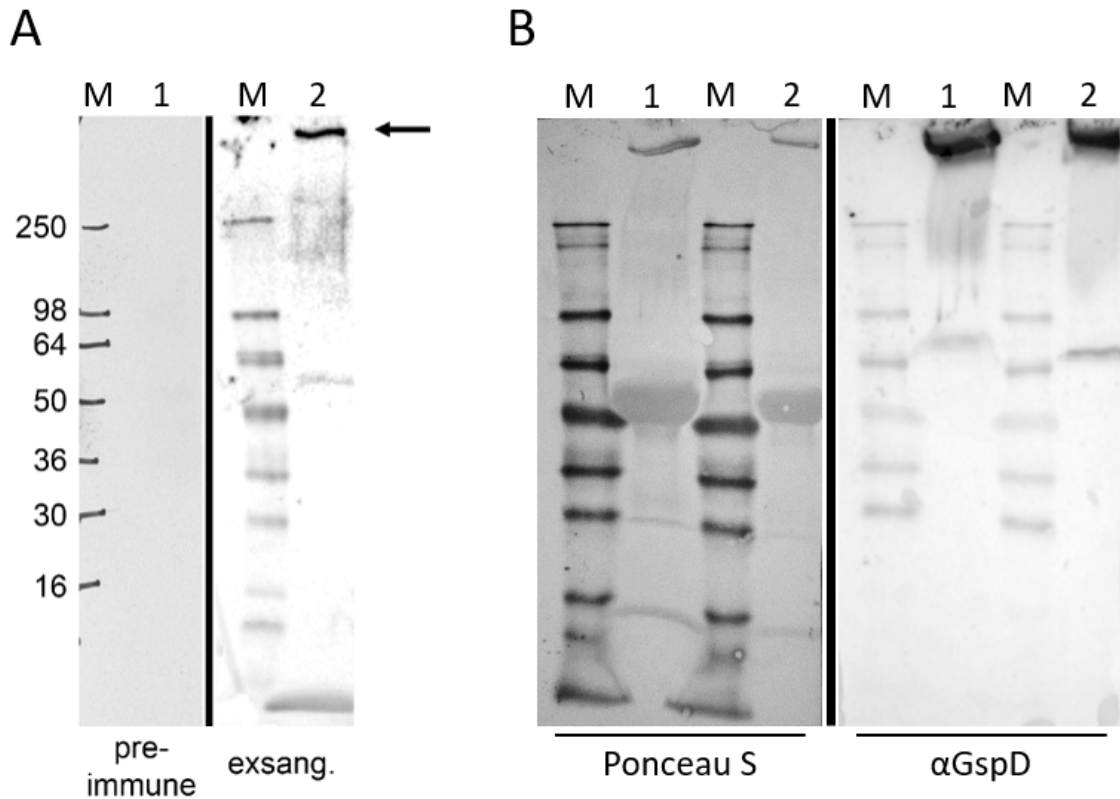

**Figure S2. Antibodies raised against GspD from *Myxococcus xanthus* and PilQ from *Oscillatoria lutea* specifically recognize PilQ from *Arthrospira platensis*, and *Oscillatoria lutea* and *Phormidium autumnale*, respectively.** (A) *A. platensis* cell envelopes were isolated, solubilized, and fractionated using CsCl gradients. Protein samples were separated by SDS-PAGE, transferred to a membrane and probed with serum from a rabbit inoculated with GspD from *M. xanthus*. The >250 kDa band of PilQ from *A. platensis* (see Fig. 1G) was the only band to react with the antibody. As a negative control, *A. platensis* total cell protein was separated and probed with an identical dilution of pre-immune serum resulting in no detectable signal. Note, the left panel is recorded using HyBlot CL autoradiography film (Denville, Metuchen, NJ), while the right panel is generated with the ChemiDoc Imaging System (BioRad, Hercules, CA). (B) Roughly equal amounts of PilQ-nozzle-enriched CsCl gradient fractions of *O. lutea* and *Ph. autumnale* nozzle

preparations were dialyzed, boiled in sample buffer, and separated on two SDS-PAGE gels. One of the gels was stained with Coomassie G250 and the >250 kDa large band of PilQ analyzed by mass spectrometry (see [Table S1](#) for mass spec data). The second gel was blotted onto nitrocellulose and imaged with a FluorChem Q system (Protein Simple, Wallingford, CT) after staining with Ponceau S (left panel). Following de-staining, the membrane was probed with serum from a rabbit inoculated with PilQ from *O. lutea* (expressed in and purified from *E. coli*) and imaged with the FluorChem Q system. Lane 1, *O. lutea*; lane 2 *Ph. autumnale*. Similar to [Fig. S2A](#), the pre-immune serum did not result in a detectable signal (not shown).

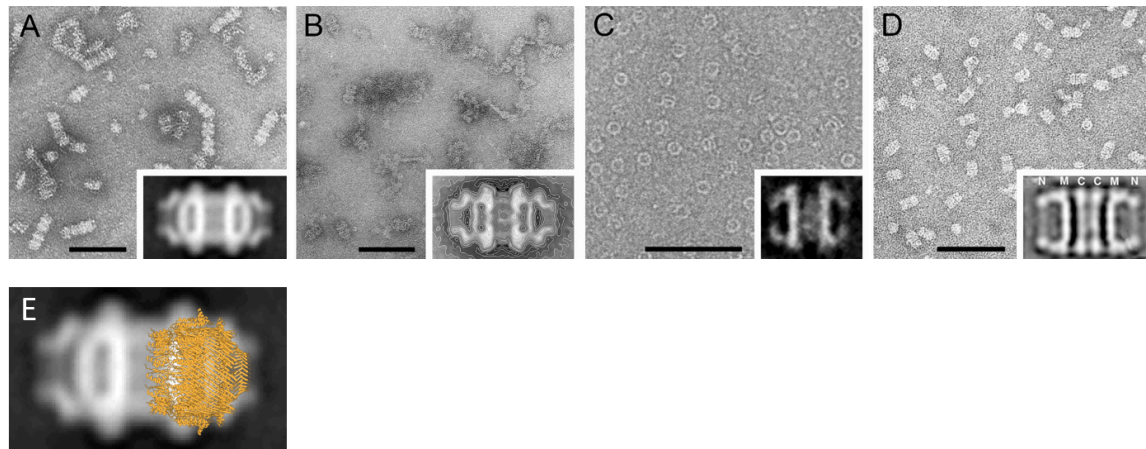

**Figure S3. Comparison of selected isolated PilQ dimer complexes following negative staining**

**and averaging.** Despite large variations in the molecular masses of PilQ monomers and of the

overall length of the complexes (*Arthrospira platensis* PilQ: 756 aa, 81 kDa, 32nm length;

*Phormidium uncinatum* PilQ: molecular weight unknown, 32 nm length; *Klebsiella oxytoca* PulD<sup>28-</sup>

<sup>42/259-660</sup>: 416 aa, 44 kDa, length 15 nm; filamentous phage f1, secretin pIV: 405 aa, 43 kDa, length

24 nm; all amino acid data and mass calculations correspond to the mature proteins lacking signal

peptides), all isolated dimers show similar, characteristic structural features, further supporting the

idea that the cyanobacterial complexes are formed by PilQ. These structural features comprise large

openings that provide access to a vestibule-like chamber whose bottom is formed by a massive ring

structure, followed either by a narrow ring (pIV complex) or a poorly structured constriction (PilQ

dimers of cyanobacteria and *K. oxytoca*). (A) Isolated and enriched PilQ dimer complexes from the

cyanobacterium *A. platensis*. The multimeric complexes are often arranged in chains of two, three,

or, rarely, greater numbers of complexes. The inset shows the characteristic appearance of the

32 nm-long dimers, based on the two-fold symmetrized average of 902 particle halves. (B) Isolated

PilQ dimers of the filamentous cyanobacterium *Ph. uncinatum* (51). The averaged dimers have the

same overall dimensions ( $32 \times 20$  nm) and architecture as the PilQ dimers of *A. platensis*, revealing that these structures are identical. The inset shows the average of 334 side views. (C) Isolated native PulD complexes from the bacterium *K. oxytoca* (1). In contrast to the cyanobacterial PilQ complexes, only monomeric rings ca. 13 nm wide and 10 nm long were isolated. Replacement of a highly-conserved threonine with isoleucine (T470I) or valine (T470V) in a partially shortened version of PulD<sup>28-42/259-660</sup> resulted in the formation of a small subpopulation of ca. 15 nm long dimers (2). The inset shows the average of 16 such T470I dimer complexes. (D) Isolated pIV secretin dimer complexes from the filamentous phage f1 (12). Similar to the PilQ complexes of *A. platensis* and *P. uncinatum*, pIV complexes were recovered as dimers during the isolation, a result that was suggested to be due to the use of detergent during the purification process. The letters N, C, and M denote the suggested positions of the N- and C-termini and the middle part of the monomers within each half particle, respectively. Note, that insets are not drawn to scale, but presented to demonstrate the morphological similarities between these complexes. All scale bars, 100 nm. (E) Overlay of the atomic structure of the *Vibrio cholera* GspD monomeric ring (PDB accession code 5WQ8) onto the 32 nm-long two-fold symmetrized dimers of the *A. platensis* PilQ structure. Note, the *A. spirulina* structure has a maximal width of 20 nm, while the *V. cholera* structure is only 16 nm wide. The image demonstrates that the isolated cyanobacterial PilQ structures are likely dimers of monomeric secretin rings as seen in *V. cholera* or *M. xanthus*.



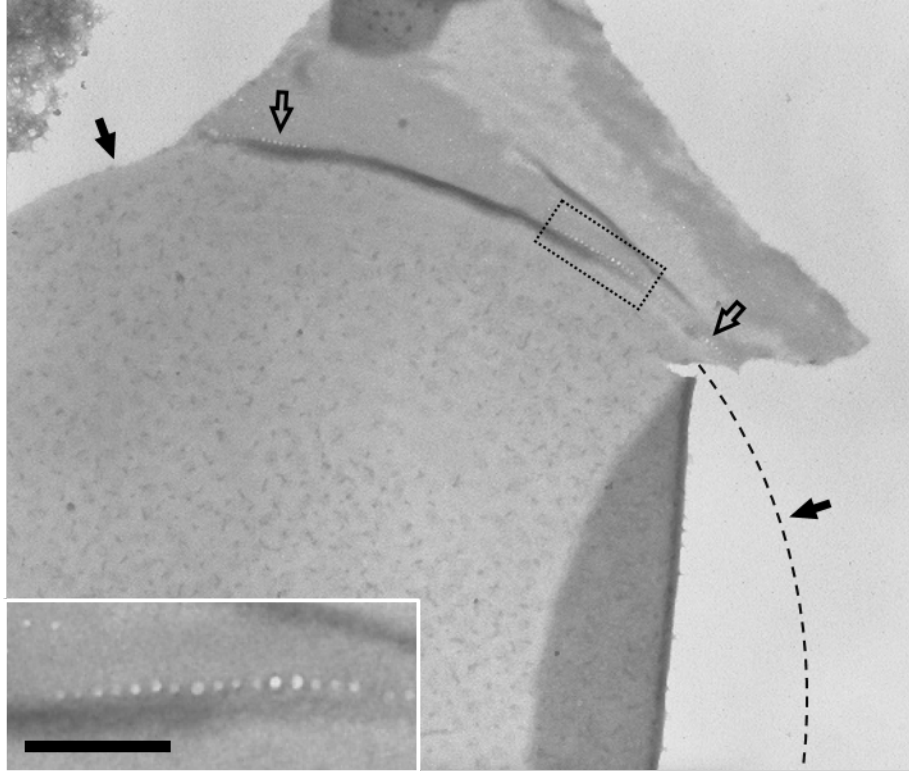

**Figure S4. Disc-shaped cross wall of *Oscillatoria lutea* showing nozzle-containing portions of the attached longitudinal cell wall.** Upon mechanical cell breakage and negative staining, individual disc-shaped cross walls can be found that still have either parts or the entire nozzle-containing longitudinal cell wall attached. The here visible incomplete presence of the nozzle-containing longitudinal cell wall explains why in the fluorescence light microscopy (**Fig. 2A**) the antibody often does not label the entire circumference of the disc-shaped cross wall. The solid arrows and the stippled line show the contour of the disc-shaped cross wall which at the right edge is partly folded over and therefore stained more darkly. The hollow arrows point to the parts of the attached longitudinal cell wall where the row of trans-peptidoglycan channels of the PilQ nozzle apparatus is visible. The inset shows a higher magnification of the boxed area of the nozzle-containing longitudinal wall clearly showing the row of channels on that side of the cross wall.

Note, the other row of channels is on the opposite side of the cross wall and therefore only faintly visible if at all in the inset. Scale bar, 200 nm.

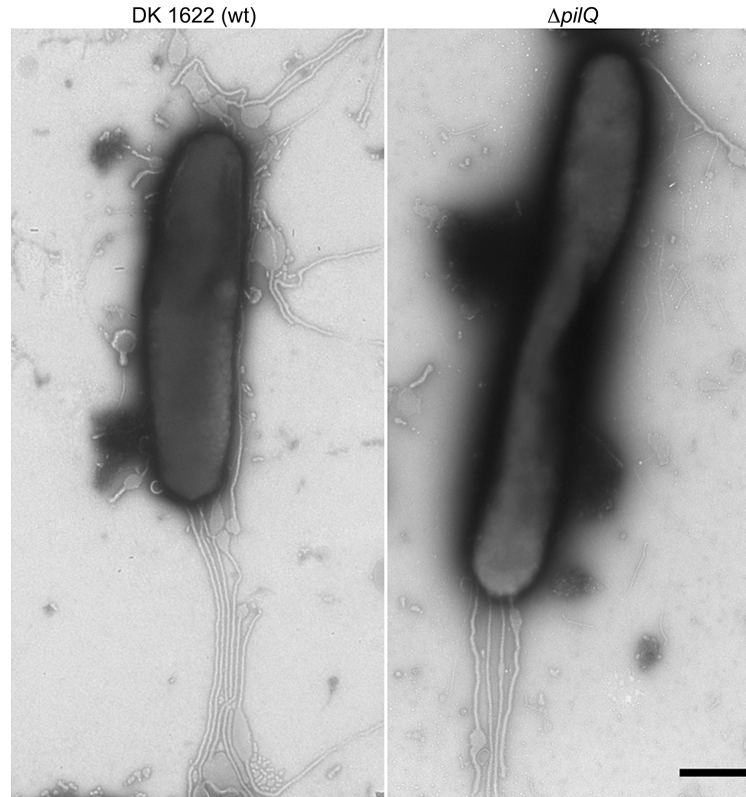

**Figure S5. Slime secretion of *Myxococcus xanthus*  $\Delta pilQ$  cells.** To determine if the secretin PilQ is involved in slime secretion, wildtype and mutant strain cells were allowed to glide on chitosan-coated grids. Electron micrographs of representative cells show that the slime secretion of the two strains is indistinguishable confirming that only GspD engages in the secretion of slime. Scale bar, 500 nm.

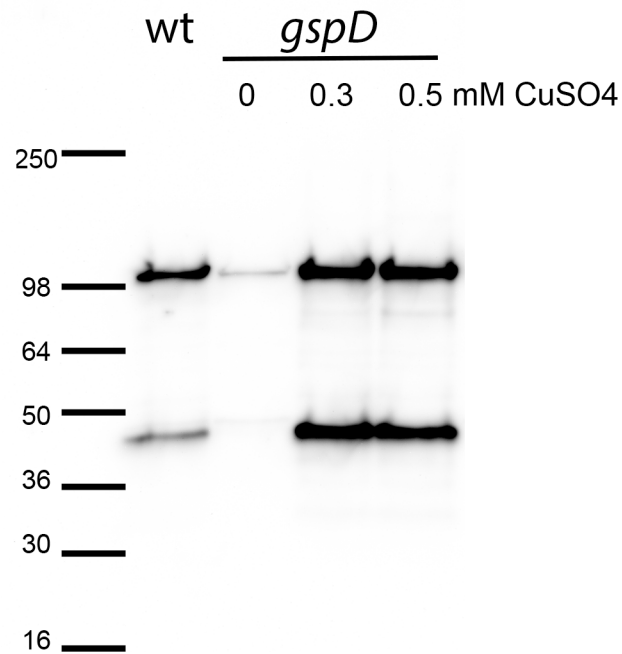

**Figure S6. Copper-dependent overexpression of GspD in *Myxococcus xanthus*.** Wildtype *M. xanthus* or mutants expressing *gspD* under control of a copper inducible promoter were grown with the indicated concentrations of CuSO<sub>4</sub>. Steady-state levels of GspD were evaluated by immunoblot with an affinity-purified anti-GspD antibody. This representative blot reveals that addition of copper to the medium results in an increase of *gspD* expression that eventually stabilizes at a copper concentration of about 0.3 mM. GspD is visualized as a ~100 kDa band, and occasionally a second band at ~47 kDa.

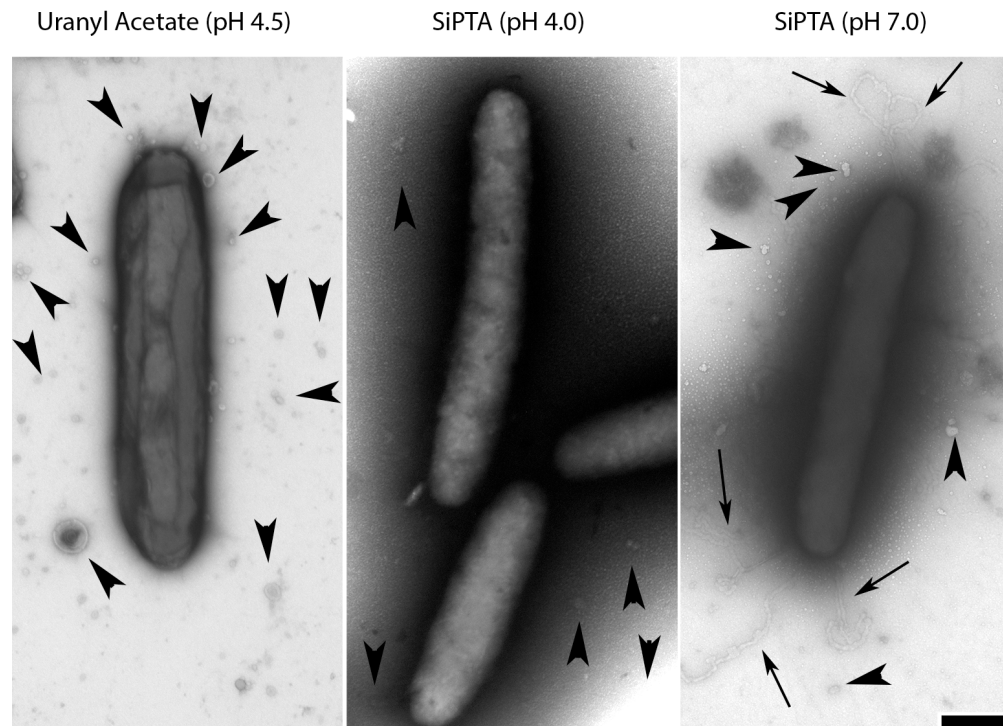

**Figure S7. Identification and detection of slime trails of *Myxococcus xanthus* using electron microscopy of cells that are negatively stained at neutral pH.** *M. xanthus* cells leave slime trails behind that have been visualized using numerous staining and microscopy methods. As these structures were originally discovered using TEM, we used their pH sensitivity during negative staining to discriminate them from other outer membrane-derived structures such as lipid tubules. Acidic stains such as un-buffered uranyl acetate (A) or silico phosphotungstic acid (SiPTA) (B) specifically remove the slime trails while SiPTA at neutral pH (C) preserves the slime trails. In contrast, membrane vesicles are not affected by the pH of the negative staining. Arrows, slime trails; arrowheads, extracellular vesicles; scale bar, 0.5  $\mu\text{m}$ .

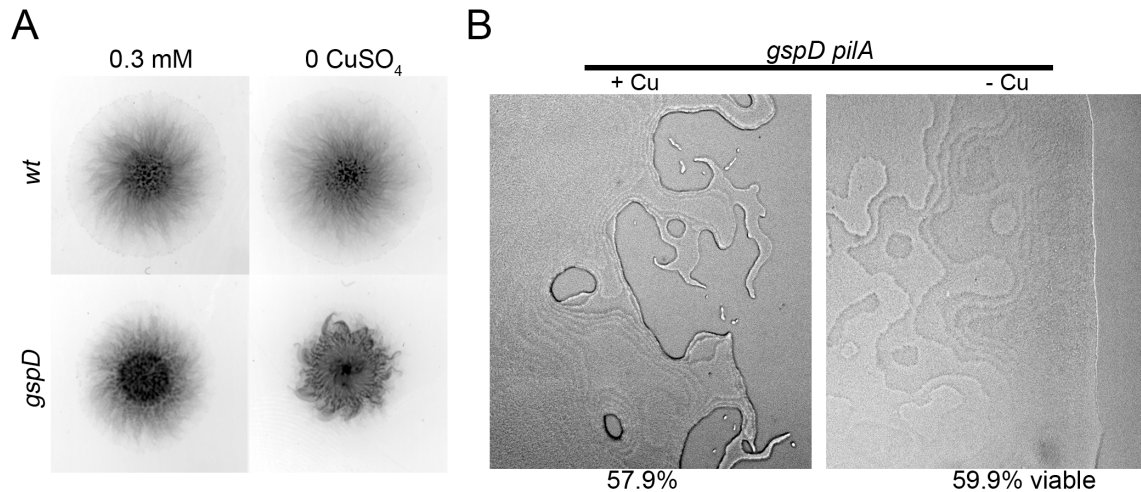

**Figure S8. Swarming defect in GspD-depleted cells cannot be explained by failure of cells to grow** (A) To visualize social motility, *gspD* cells were grown in liquid culture in the absence of copper for 24 h, concentrated to  $5 \times 10^9$  cells/ml in CTT, and 10  $\mu$ l were spotted onto 1/2 $\times$  CTT plates with 0.4% agar, containing either 300  $\mu$ M CuSO<sub>4</sub> (0.3 mM) or 200  $\mu$ M BCS (0 mM). Cells were allowed to swarm for 24 h and plates were scanned. All concentrations are mM CuSO<sub>4</sub>. (B) To visualize adventurous motility, *gspD*  $\Delta$ *pilA* cells were grown in liquid culture in the absence of copper for 24 h, diluted to  $1 \times 10^8$  cells/ml in CTT, and 10  $\mu$ l were spotted onto 1/2 $\times$  CTT plates with 1.5% agar, containing either 100  $\mu$ M CuSO<sub>4</sub> (+ CuSO<sub>4</sub>) or 200  $\mu$ M BCS (- CuSO<sub>4</sub>). After 48 h, cells were imaged by light microscope. To determine viability, cells were collected into PM buffer (20 mM Na-phosphate, 1 mM MgSO<sub>4</sub>, pH 7.4) and stained with the LIVE/DEAD BacLight Bacterial Viability kit (Molecular Probes, Eugene, OR) according to the manufacturer's instructions. Cells were imaged by fluorescence microscopy, and scored as viable (green) or dead (red) for each swarm ( $n > 400$  cells); numbers indicate the percentage of viable cells.

|                 |                                                                   |     |
|-----------------|-------------------------------------------------------------------|-----|
| Aplatensis_PilQ | mr dilgfgggvmggvaaamvvavapalaf-----tvvr diqlfqa---dngeinlv        | 49  |
| Phagef1_pIV     | -----mkl ln                                                       | 5   |
| Mxanthus_GspD   | -----mktlpswmlclclalavpaqaqrrsppsgsagerkisp                       | 38  |
| Koxytoca_PulD   | -----miit-----nvrtpfflt                                           | 13  |
| ETEC_GspD       | -----mfwr ditsvvrkk-----ttglktkkrllp                              | 26  |
|                 |                                                                   |     |
| Aplatensis_PilQ | vtd-----gge--rpavfv--irrgndfvaditnaqlssangsfqqnnpagias            | 96  |
| Phagef1_pIV     | vin-----fvflmfv--sssfagviennsplrd-----f                           | 34  |
| Mxanthus_GspD   | qpggatsagdanagprrtptcee--arnarygiyfdkvelk-----l                   | 80  |
| Koxytoca_PulD   | lli-----faalifkpa--aaefsfaskgtdige-----f                          | 42  |
| ETEC_GspD       | lvl-----aalcsspwaaeatftanfktdlks-----f                            | 57  |
|                 |                                                                   |     |
| Aplatensis_PilQ | vv nql dptsirvilt-gtngspeariiqgagdaiaa--iapegaiapafapeqpgng       | 153 |
| Phagef1_pIV     | vtwyskqtgesvils pdvkgtvtvyss-----dykpenlrnffisv lrannfdmvg sn--   | 87  |
| Mxanthus_GspD   | vqtvadatcrtfilpenvrgkisiigpengrvevadafysaflaal danglaayqyg-r      | 139 |
| Koxytoca_PulD   | intvsknl nktviidpsvrgtitvrsy---dmnee qyyqfflsvldvygfavinmng       | 98  |
| ETEC_GspD       | ietvganlnktilingpgvggkvsirtm---tpnerqyyqlfln lleaqgyavvpmend      | 113 |
|                 |                                                                   |     |
| Aplatensis_PilQ | tsqvmvp----dppvsitgqptapsqngnneiimpdaltppmqgaplqp-----rrs         | 202 |
| Phagef1_pIV     | -----                                                             | 87  |
| Mxanthus_GspD   | fmkivdkrsaknpiptiveegepyttneqmvtklfr--vqnveveplrgvlqqlvskdg       | 197 |
| Koxytoca_PulD   | vlkvvrskdaktaavvasda-apgt-gdevvtrvvp--lt nvaardlapllrq lndnag     | 154 |
| ETEC_GspD       | vlkvvksaakvepllvgegsdnaya-gdemv tkvvp--vrnsvrelapilrqmidsag       | 170 |
|                 |                                                                   |     |
| Aplatensis_PilQ | ldtppfqpravapplgdiavsningvsnvln tneii prlvlr-----das              | 250 |
| Phagef1_pIV     | -----                                                             | 87  |
| Mxanthus_GspD   | --dtipppdtii-in-----dvgsnihrleri ihqldtraasdemriiqvqyas           | 244 |
| Koxytoca_PulD   | agsvvhyps nvlmt-----graavikrllt ivervdnagd-rsvvtvplswas           | 203 |
| ETEC_GspD       | sgnvvnvdpsnvimlt-----grasvverlteviqrvdhagn-rteevipldnas           | 219 |
|                 |                                                                   |     |
| Aplatensis_PilQ | vrevlsllarvaglnvafsnlrqdrttgrfrp-----gdeaqefki----                | 291 |
| Phagef1_pIV     | -----                                                             | 87  |
| Mxanthus_GspD   | aqd vantvqrlfeakgar--pgqpaaagr nvp paaaqatp qagqgg egatggpvtlsqii | 302 |
| Koxytoca_PulD   | aadvvklvtelnkdt-----sksalp gsmvanv                                | 232 |
| ETEC_GspD       | aseiarvlesltkns-----genqpatlksqiv                                 | 247 |
|                 |                                                                   |     |
| Aplatensis_PilQ | -----s dienepvqevfnvylrltqlqanrv--gntvfv g felpesagnivmr tlrnn    | 343 |
| Phagef1_pIV     | -----psliqkynp--nnqdyldel pssdnqeyddnsaps gffvpqndvntq--t fkin    | 138 |
| Mxanthus_GspD   | pdertnkliivasp--aaferiqdvlvgq---idipts-----gggrin--vyyle          | 345 |
| Koxytoca_PulD   | adertnavlvsgep--nsrqrivanikq---ldr qqa-----tggntk--viylk          | 275 |
| ETEC_GspD       | adertnsvivsgdp--atrckrrlirr---ldseme-----rsgnsq--vfylyk           | 290 |
|                 |                                                                   |     |
| Aplatensis_PilQ | qvaeeaaasflstggaatqvlvtetrrvtegdgdnaltitssstriqplgategq----       | 398 |
| Phagef1_pIV     | nvrakdlirvve-----l fvk sn-----                                    | 156 |
| Mxanthus_GspD   | nanaeelastlq-----slaqgtgnapr--grtpvparppgagggptttqa               | 389 |
| Koxytoca_PulD   | yakaadlvevit-----gisstmqsekq--aakpv-----                          | 303 |
| ETEC_GspD       | yskaealvdvlyk-----qvs gtltaake--eaegt-----                        | 318 |



|                                                                          |                                                                |     |
|--------------------------------------------------------------------------|----------------------------------------------------------------|-----|
| Aplatensis_PilQ                                                          | gplvrlrglsvsfvdarlnsvtlvgdpekvmatanlmqldlrqrgwavnkiiisvnlgtga  | 458 |
| Phagef1_pIV                                                              | ---tskssnvlslidgsnlllvvsapkdlldnlpqflstvdldptdglieglifevqqgdal | 213 |
| Mxanthus_GspD                                                            | aelfsgevkiisadkgsnslvivassadyknivqvqqldkprrgvfvveavimevnlrdna  | 449 |
| Koxytoca_PulD                                                            | aaldk-niilikahgqtnalivtaapdvmdlervldqldirrpqvlveaiaevqdadgl    | 362 |
| ETEC_GspD                                                                | vsgreivsiaaskhsnalivtapqdimqslqsvleqldirragvhealivevaegsni     | 378 |
| <div style="background-color: yellow; height: 15px; width: 100%;"></div> |                                                                |     |
| Aplatensis_PilQ                                                          | tqsssfsgindtffvndggaaslnfgginpptrgqstggvtsrpiitnplstqepffdr    | 518 |
| Phagef1_pIV                                                              | dfsfaagsqrgt-----vag-----                                      | 228 |
| Mxanthus_GspD                                                            | rlgmnlhsgfs--ltsngdqvpqg-ligtn-----                            | 476 |
| Koxytoca_PulD                                                            | nlgigwanknagmtqftnsg-lpistaiaag-----                           | 391 |
| ETEC_GspD                                                                | nfgvqwaskdaglmqfangtqipigtlgaa-----isqakpqkgs                  | 418 |
| Aplatensis_PilQ                                                          | dstirtpltapgggiglrpirpvtterpggvglseyepferdldgtlsalgsttvsvfpf   | 578 |
| Phagef1_pIV                                                              | -----gvntdrl-----tsvlsaggsfgif-----                            | 249 |
| Mxanthus_GspD                                                            | -----tsg--qglppsls-----ltslsyggflagiqgpvipalek-----            | 511 |
| Koxytoca_PulD                                                            | -----anqynk-dgtvsssl-----asalsfngiaagf-----                    | 419 |
| ETEC_GspD                                                                | tvisengattinpdngdlstl-----aqlsgfsgtavgv-----                   | 454 |
| Aplatensis_PilQ                                                          | fqyprflstlgaqivsgrakilldptlvvgeetasvqlvgevlqsrtdtftdtp---      | 634 |
| Phagef1_pIV                                                              | --ngdvlglsvralktnshskilsvprilltsgqkgsisvqgnvpfitgrvtgesa---    | 303 |
| Mxanthus_GspD                                                            | -lgipafgvvlhamqgssdvnlstphiltsdneaeitvqgnvpfsgfnptslgslga      | 570 |
| Koxytoca_PulD                                                            | --yqgnwamlitalssstknldilatsivtldnmeatfnvqgevpvltgsgtts-g---    | 472 |
| ETEC_GspD                                                                | --vkgdwmalvgavkndsssnvltspstittldnqeaaffmvqgdvpvltgstvgsnn---  | 508 |
| Aplatensis_PilQ                                                          | -----sgtretiqpqlvpvgiltlgvnnvqridngfvttintnpevs                | 674 |
| Phagef1_pIV                                                              | -----nvnnpfqtierg--nvglsmsvf-pvamaggnivlditskad                | 342 |
| Mxanthus_GspD                                                            | gvgggagalggglggglgsllyapitrg--nvelkltkvk-pqinesdyirivinqgte    | 627 |
| Koxytoca_PulD                                                            | -----dnifntverk--tvqiklkvk-pqinegdsvlleiegevs                  | 509 |
| ETEC_GspD                                                                | -----snpntverk--kvgimlkvt-pqinegnavqrviegevs                   | 545 |
| Aplatensis_PilQ                                                          | spgsqvgtggddfvlqifrrnlqsgrrlrlrdggtlivsgliidqertdvsklpllgdipi  | 734 |
| Phagef1_pIV                                                              | slss---stqa-sdvitnqrsiattvnrlrdggtlllggltdykntsqdsgvpflskipl   | 397 |
| Mxanthus_GspD                                                            | eias---tdpv-lgpttsrksaktviardgetlviggimqdrlesvskvpilgdipi      | 682 |
| Koxytoca_PulD                                                            | svadaasstssd-lgatfntrtvnnavlvsggetvvggllkksvstakvpllgdipi      | 568 |
| ETEC_GspD                                                                | kveqg-----ts-ldvvfgerkkktvlandgellivlgglmdqagesvakvpllgdipi    | 599 |
| Aplatensis_PilQ                                                          | lgsifrrsstsseraevivlvtpsllddsdrgfgyqnnfspdv---rqmmq-gr-----    | 785 |
| Phagef1_pIV                                                              | igllfssrdsdsneestlylvkativral-----                             | 426 |
| Mxanthus_GspD                                                            | lghlfrdttrrktktnllfltpyilrpgpedfrviferkmkerqqfveqfygq--vpgyd   | 740 |
| Koxytoca_PulD                                                            | igalfrstskkvskrnlmlfirptvirrdreyrqassgqyaafnd--aqskqrgkennda   | 626 |
| ETEC_GspD                                                                | ignlfkstadkkekrnlmvfirptlrlrdgmaadgvsqrkynymra--eqiyr-d-eqgls  | 655 |
| Aplatensis_PilQ                                                          | -----                                                          | 785 |
| Phagef1_pIV                                                              | -----                                                          | 426 |
| Mxanthus_GspD                                                            | vav----dfsrkpgplsrmgqkvteeqraenggpplsgeriitpapppasspgavpst     | 795 |
| Koxytoca_PulD                                                            | mlsndlleiyprqdtaa---frqvsaaaidafnlgnl-----                     | 660 |
| ETEC_GspD                                                                | lmphtaqpvlpaqnal---pp---evraflnagrtr-----                      | 686 |
| Aplatensis_PilQ                                                          | -----                                                          | 785 |
| Phagef1_pIV                                                              | -----                                                          | 426 |
| Mxanthus_GspD                                                            | qrqapaspedeggpavregmpppdgseepvpapapqnfeppppeaiqvpeagdaerlriq   | 855 |
| Koxytoca_PulD                                                            | -----                                                          | 660 |
| ETEC_GspD                                                                | -----                                                          | 686 |
| Aplatensis_PilQ                                                          | ----- 785                                                      |     |

|               |          |     |
|---------------|----------|-----|
| Phagef1_pIV   | -----    | 426 |
| Mxanthus_GspD | hiepgpre | 863 |
| Koxytoca_PulD | -----    | 660 |
| ETEC_GspD     | -----    | 686 |

**Figure S9. Multiple alignment of PilQ (*A. platensis*), pIV (phage F1), GspD (*M. xanthus*), PulD (*K. oxytoca*) and GspD (*E. coli* ETEC) using Clustal Omega.** Yellow indicates positions occupied by single, fully conserved residues. Green positions indicate conservation between strongly similar residues that score > 0.5 in the Gonnet PAM 250 matrix, while blue indicates lower conservation scoring < 0.5 in the Gonnet PAM matrix. The color bars beneath the aligned sequences indicate the positions of the periplasmic N0 (light blue), N1 (green), N2 (red), and N3 (yellow) domains. All domains were assigned based on the published crystal structure of *E. coli* ETEC (23) and sequences were aligned using Clustal Omega (3).

| Species                     | Type of Analyses  | Mw* and aa        | No. of peptides      | Sequence coverage [%]* | Q-value | Score | MaxBP <sup>a</sup> | MS/MS Spectra <sup>a</sup> |
|-----------------------------|-------------------|-------------------|----------------------|------------------------|---------|-------|--------------------|----------------------------|
| <i>Athrospira platensis</i> | Edman degradation | 81 kDa<br>785/757 | 2 totalling<br>26 aa | 3                      | -       | -     | -                  | -                          |
|                             | Mass spectrometry |                   | 26                   | 24                     | -       | -     | 9.0e <sup>9</sup>  | 647                        |
|                             |                   |                   | 21                   | 20                     | -       | -     | 7.2e <sup>9</sup>  | 572                        |
|                             |                   |                   | 24                   | 38                     | 0       | 323   | -                  | -                          |
| <i>Phormidium autumnale</i> | Mass spectrometry | 82 kDa<br>805/778 | 29                   | 46                     | 0       | 323   | -                  | -                          |
| <i>Oscillatoria lutea</i>   | Mass spectrometry | 83 kDa<br>810/783 | 158                  | 72                     | 0       | 323   | -                  | -                          |
| <i>Myxococcus xanthus</i>   | Mass spectrometry | 90 kDa<br>863/842 | 29                   | 40                     | 0       | 323   | -                  | -                          |

**Table S1. Mass spec identification of the PilQ proteins of the various cyanobacterial species and of the GspD protein of *M. xanthus*.** Four independent isolations were used to identify

PilQ of *A. platensis* using two different methods, Edman degradation and mass spectrometry, while GspD from *M. xanthus* was identified only by mass spectrometry.

<sup>a</sup>Note, that these mass spectrometry identifications were performed in 2011 at Harvard Mass Spectrometry and Proteomics Resource Laboratory, FAS Center for Systems Biology by microcapillary reverse-phase HPLC nano-electrospray tandem mass spectrometry ( $\mu$ LC/MS/MS) on a Thermo LTQ-Orbitrap mass spectrometer using MS/MS spectra and the MaxBP parameter for evaluation that are not any longer used. All other mass spectrometry measurements were done at the University of Sheffield using current methods described in the Materials and Methods section. \*The M<sub>w</sub> and the % sequence coverage represent the full-length protein. The number of aa is given with and without the signal peptide.

## References

1. M. Chami, et al., Structural insights into the secretin PulD and its trypsin-resistant core. *J Biol Chem* **280**, 37732-37741 (2005).
2. I. Guilvout, et al., Independent domain assembly in a trapped folding intermediate of multimeric outer membrane secretins. *Structure* **22**, 582-589 (2014).
3. S. Sievers, et al., Fast, scalable generation of high-quality protein multiple sequence alignments using Clustal Omega. *Mol Syst Biol* **7**, 539 (2011).
